# Supplementary material for: Deep eutectic solvents on a tightrope: balancing the entropy and enthalpy of mixing
Source: Royal Society of Chemistry journal article supplement (doi:10.1039/d4fd00048j), 2024-01-01
Supplement: d4fd00048j1.pdf [file d4fd00048j1.pdf]

Supplementary Information for

# Deep Eutectic Solvents on a Tightrope: Balancing the Entropy and Enthalpy of Mixing

Adriaan van den Bruinhorst<sup>1,\*</sup>, Chiara Corsini<sup>1</sup>, Guillaume Depraetère<sup>1</sup>,  
Nithavong Cam<sup>1</sup>, Agílio Pádua<sup>1</sup>, and Margarida Costa Gomes<sup>1,\*</sup>

<sup>1</sup>École Normale Supérieure de Lyon and CNRS, Laboratoire de Chimie, Ionic  
Liquids Group, 46 allée d'Italie, 69364, Lyon Cedex 7, France

\*Corresponding authors: margarida.costa-gomes@ens-lyon.fr,  
adriaan.van-den-bruinhorst@ens-lyon.fr

March 11, 2024

## Contents

|                                                                      |            |
|----------------------------------------------------------------------|------------|
| <b>SI-1 Supplementary Methods</b>                                    | <b>S2</b>  |
| SI-1.1 Materials . . . . .                                           | S2         |
| SI-1.2 Karl-Fischer titration . . . . .                              | S2         |
| SI-1.3 Fitting the heat of mixing . . . . .                          | S2         |
| SI-1.4 Differential scanning calorimetry . . . . .                   | S3         |
| SI-1.5 Molecular dynamics simulations . . . . .                      | S4         |
| <b>SI-2 Supplementary Discussion</b>                                 | <b>S7</b>  |
| SI-2.1 Impact of heat capacity change on excess properties . . . . . | S7         |
| <b>SI-3 Supplementary Figures</b>                                    | <b>S11</b> |
| <b>SI-4 Supplementary Tables</b>                                     | <b>S19</b> |

## SI–1 Supplementary Methods

### SI–1.1 Materials

**Table S1** Overview of compounds used in this study as well as their abbreviations, CAS number, source, and purity

| Compound         | Abbreviation     | CAS       | Supplier        | Purity <sup>a</sup> (%) |
|------------------|------------------|-----------|-----------------|-------------------------|
| choline chloride | ChCl             | 67-48-1   | Acros Chemicals | 99                      |
| water            | H <sub>2</sub> O | 7732-18-5 | Sigma-Aldrich   | n.r. <sup>b</sup>       |
| ethylene glycol  | EG               | 107-21-1  | Sigma-Aldrich   | >99.5                   |
| 1,3-propanediol  | 13PD             | 504-63-2  | Alfa Aesar      | 99                      |

<sup>a</sup> As reported by supplier

<sup>b</sup> HPLC plus grade

### SI–1.2 Karl-Fischer titration

Water contents were determined by Karl-Fischer titration using a Mettler-Toledo C20S coulometer coupled to an analytical balance (0.01 mg resolution) and with Hydranal coulomat E as medium. Liquids were injected through the septum using a needled syringe, and solid ChCl was added using a tailor-made solids syringe adapted to the coulometer glass cell that can be sealed under a dry atmosphere. Additions contained at least 100 µg of water, and reported values are the average of at least three additions. (Add picture of dosing unit)

### SI–1.3 Fitting the heat of mixing

The heat effect of mixing ( $Q$ ) as measured from calorimetry can be related to the partial molar excess enthalpy ( $H_i^E$ ) of each of the constituents:

$$\begin{aligned} Q = & \Delta n_1 (H_1^E(x_{2,\text{fin}}^{\text{cell}}) - H_1^E(x_2^{\text{syr}})) + \\ & \Delta n_2 (H_2^E(x_{2,\text{fin}}^{\text{cell}}) - H_2^E(x_2^{\text{syr}})) + \\ & n_1^{\text{cell}} (H_1^E(x_{2,\text{fin}}^{\text{cell}}) - H_1^E(x_{2,\text{ini}}^{\text{cell}})) + \\ & n_2^{\text{cell}} (H_2^E(x_{2,\text{fin}}^{\text{cell}}) - H_2^E(x_{2,\text{ini}}^{\text{cell}})) \end{aligned} \quad (\text{S1})$$

where  $n_i$  are the moles of  $i$ ,  $\Delta n_i$  the added moles of  $i$ , and  $x_i$  the mole fraction of  $i$ . Superscripts "cell" and "syr" refer to the sample cell and the syringe, respectively. Subscripts "ini" and "fin" refer to before and after the injection, respectively. The pure liquids are taken as component 1 and ChCl as component 2. For small injections made with pure liquids,  $\Delta n_2 = H_{m,1}^E(x_2^{\text{syr}}) = 0$ . As a consequence, the last two terms of Eq. S1 are negligible as compared to the first and  $H_1^E$  can be estimated from the peak integrals directly:

$$\frac{Q}{\Delta n_1} \approx H_1^E(x_{2,\text{fin}}^{\text{cell}}). \quad (\text{S2})$$

To integrate this data and obtain the total enthalpy of mixing  $H^E$ , we fitted  $H_1^E$  from ITC and  $H_2^E$  from dissolution calorimetry to a Redlich–Kister polynomial. However, we also made injections with ChCl solutions. In these cases, all  $H_i^E$  are significant and Eq. S2 does not hold. These data can still be accounted for by describing each  $H_i^E/RT$  with a Redlich-Kister

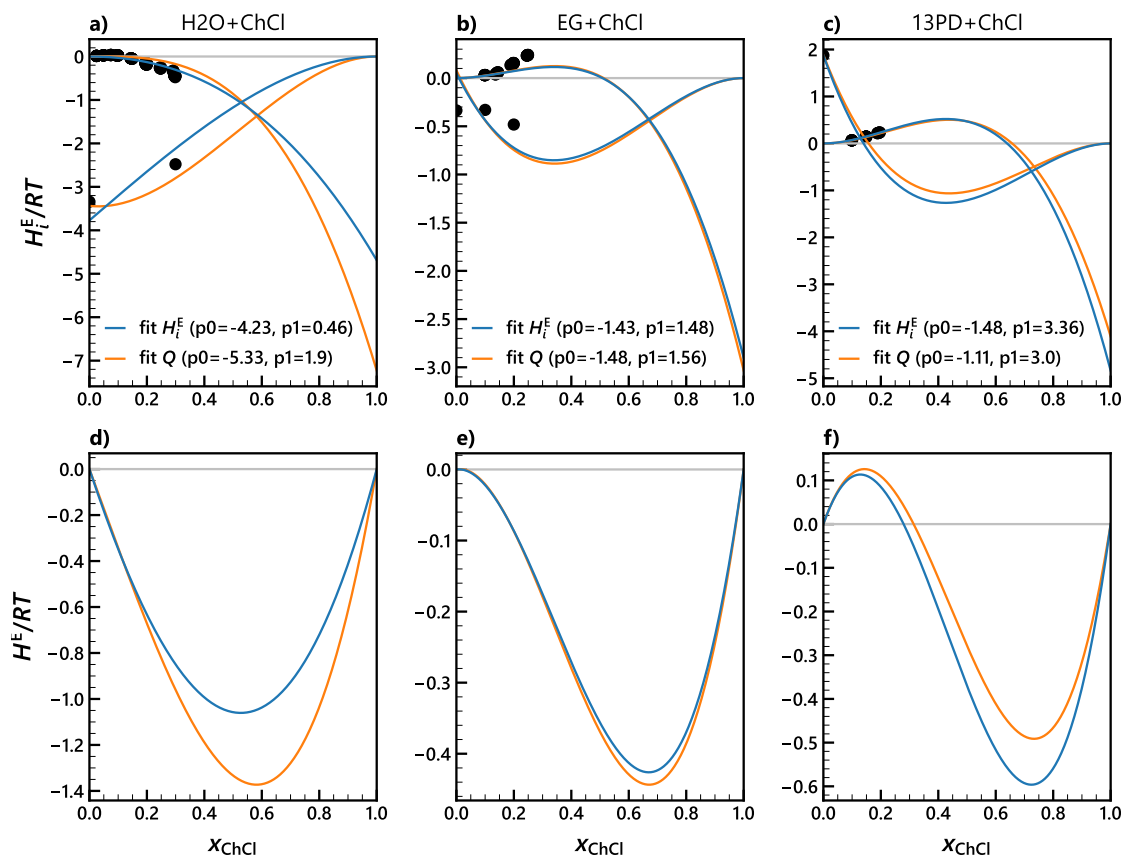

**Fig. S1** Normalised partial molar excess enthalpy ( $H_i^E$ ) data for **a)** water (H<sub>2</sub>O) + choline chloride (ChCl), **b)** ethylene glycol (EG) + ChCl, and **c)** 1,3-propanediol (13PD) + ChCl. Values were fit directly to  $H_i^E/RT$  (blue) or to  $Q_{\text{inj}}/RT \sum \Delta n_i$  (orange) using a first-order Redlich–Kister polynomial. The

polynomial and fitting  $Q_{\text{inj}}/RT \sum \Delta n_i$ . We normalised with the total injected moles to avoid larger injections weighing stronger in the objective function. We also normalised with  $RT$  to obtain the parameters for the normalised excess properties directly. Fig. S1 shows the difference between fitting  $H_i^E/RT$  data only or  $Q_{\text{inj}}/RT \sum \Delta n_i$ . We opted for fitting  $Q_{\text{inj}}/RT \sum \Delta n_i$ , despite the slight underrepresentation of  $H_i^E$ . By fitting  $Q_{\text{inj}}/RT \sum \Delta n_i$  we include all measured data points (see Tables S10–S12) and thus the most thermodynamic information.

#### SI–1.4 Differential scanning calorimetry

We observed strong supercooling behaviour for EG + ChCl and 13PD + ChCl, not showing any crystallisation peak upon a regular cooling–heating scan. We could overcome this by performing various heating/cooling cycles between the glass transition temperature and the melting point. The temperature program that allowed us to crystallise the sample is described below:

1. Heat from 30 °C to 60 °C at 10 °C/min
2. Hold 1 h at 60 °C
3. Cool from 60 °C to –80 °C at 10 °C/min
4. Hold 1 min at –80 °C
5. Heat from –80 °C to –30 °C at 1 °C/min
6. Hold 1 min at –30 °C
7. Cool from –30 °C to –80 °C at 1 °C/min
8. Hold 1 min at –80 °C
9. Heat from –80 °C to –35 °C at 1 °C/min
10. Hold 1 h at –35 °C
11. Cool from –35 °C to –60 °C at 10 °C/min
12. Hold 1 min at –60 °C

At the end of this cycle, sample is crystallised and the acquisition run is performed at a heating rate of 1, 2, 5 or 10 °C/min. A typical thermogram of this acquisition run is shown in figure S2.

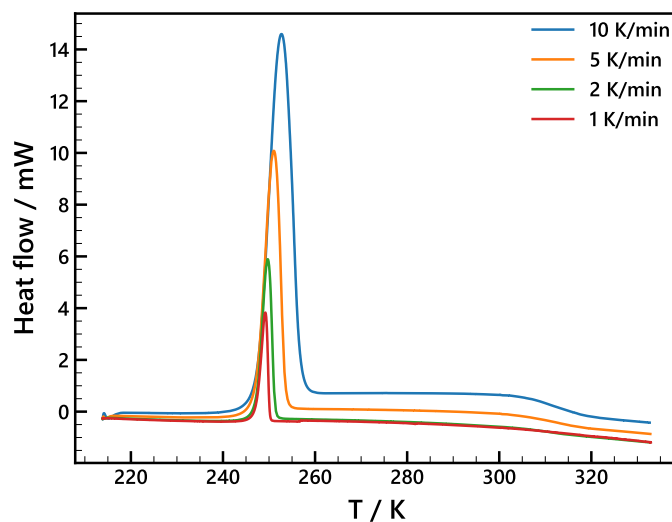

**Fig. S2** Representative DSC thermogram upon heating EG + ChCl ( $x_{\text{ChCl}} = 0.35$ ) at various heating rates. Endotherms up.

### SI–1.5 Molecular dynamics simulations

The expected coordination number taking into account the change in ChCl concentration from  $x_{\text{ChCl}}^0$  to  $x_{\text{ChCl}}^1$  was calculated by

$$n_{\text{coord}}^{\text{exp}}(x_{\text{ChCl}}^1) = n_{\text{coord}}(x_{\text{ChCl}}^0) \frac{n_{\text{acc}}(x_{\text{ChCl}}^1) n_{\text{tot}}(x_{\text{ChCl}}^0)}{n_{\text{acc}}(x_{\text{ChCl}}^0) n_{\text{tot}}(x_{\text{ChCl}}^1)} \quad (\text{S3})$$

where  $n_{\text{coord}}$ ,  $n_{\text{acc}}$  and  $n_{\text{tot}}$  are the coordination number, the number of acceptor atoms and the total number of atoms in the system, respectively.

**Table S2** Composition of the simulated systems

| $x_{\text{ChCl}}$ | Number of ChCl | Number of HBD | Total number of atoms |
|-------------------|----------------|---------------|-----------------------|
| Ethylene glycol   |                |               |                       |
| 0.0               | 0              | 1500          | 15000                 |
| 0.1               | 135            | 1215          | 15120                 |
| 0.3               | 336            | 784           | 15232                 |
| Water             |                |               |                       |
| 0.0               | 0              | 5000          | 15000                 |
| 0.1               | 309            | 2781          | 15141                 |
| 0.3               | 522            | 1218          | 15138                 |

**Table S3** Calculated liquid densities compared with experimental data.

| $\rho(T_0)/\text{g}\cdot\text{cm}^{-3}$ | Simulation        | Experiment          |
|-----------------------------------------|-------------------|---------------------|
| $x_{\text{ChCl}}$                       |                   |                     |
| Ethylene glycol $T_0 = 333\text{ K}$    |                   |                     |
| 0.0                                     | $1.070 \pm 0.004$ | $1.08398^\dagger$   |
| 0.1                                     | $1.054 \pm 0.004$ | $1.090 \pm 0.002^*$ |
| 0.3                                     | $1.054 \pm 0.004$ | $1.097 \pm 0.002^*$ |
| Water $T_0 = 353\text{ K}$              |                   |                     |
| 0.0                                     | $0.955 \pm 0.004$ | $0.97179^\ddagger$  |
| 0.1                                     | $1.096 \pm 0.003$ | $1.029 \pm 0.002^*$ |
| 0.3                                     | $1.140 \pm 0.003$ | $1.073 \pm 0.002^*$ |

\* See Fig. S3 and S4;  $\dagger$  From<sup>[1]</sup>;  $\ddagger$  From<sup>[2]</sup>.

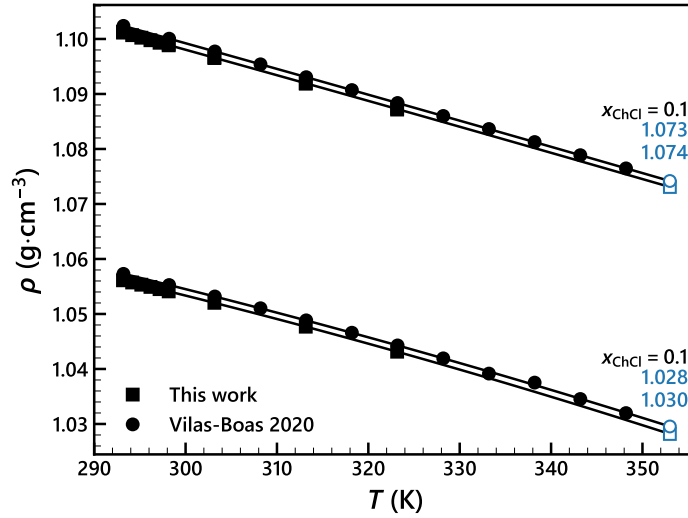

**Fig. S3** Estimated densities for  $\text{H}_2\text{O} + \text{choline chloride (ChCl)}$  at mole fractions  $x_{\text{ChCl}} = 0.1$  and  $x_{\text{ChCl}} = 0.3$  by extrapolating the data to 353 K using a second-order polynomial. Data was measured in this work and from Vilas-Boas *et al.*<sup>[3]</sup>.

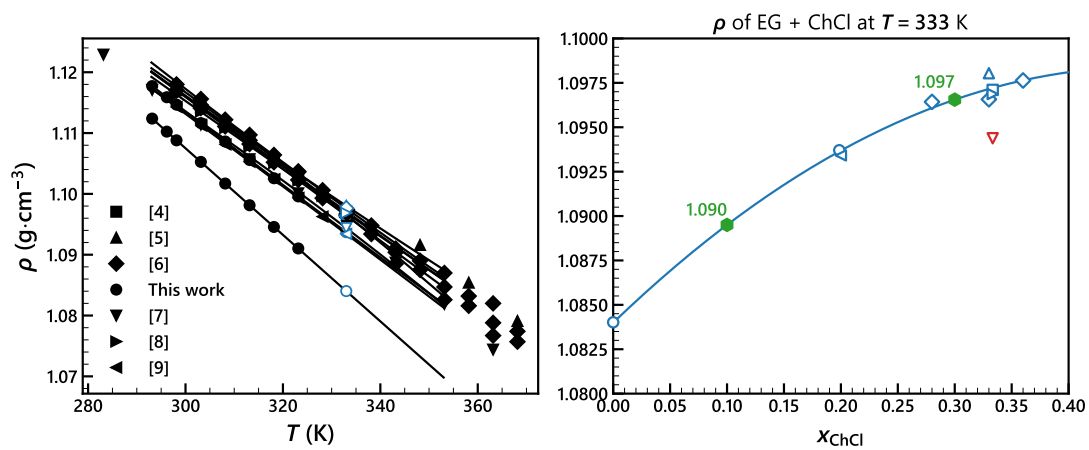

**Fig. S4** Estimated densities for ethylene glycol + choline chloride (EG + ChCl) by interpolating the data to 333 K and to  $x_{\text{ChCl}} = 0.1$  and  $x_{\text{ChCl}} = 0.3$  and using second-order polynomials. Data was measured in this work and from<sup>[4-9]</sup>. The data from Yadav *et al.*<sup>[7]</sup> (in red) was omitted in the composition-based fit because it does not match the general trend of the other sources or this work.

## SI–2 Supplementary Discussion

### SI–2.1 Impact of heat capacity change on excess properties

**Heat capacity change of fusion.** As discussed in the main text,  $\Delta_{\text{trs}}C_{p,i}$  significantly impacts SLE-derived  $G_i^E$  values. The  $\Delta_{\text{trs}}C_{p,i}$ -term is often ignored, but this is only valid over small temperature intervals. Studied mixtures consist of a low-melting compound and a high-melting salt. Hence, the salt’s melting point depression is large and the  $\Delta_{\text{fus}}C_{p,\text{salt}}$  contribution is significant. It is difficult to obtain accurate data on the salt’s liquid heat capacity at temperatures well below its melting point. Therefore, it is commonly assumed that the heat capacities of the liquid and solid change as a function of temperature, but their difference ( $\Delta_{\text{fus}}C_{p,\text{salt}}$ ) is fairly constant. As significant entropy differences between the solid and the liquid phase exist, it remains an approximation. However, it provides a better description of  $G_i^E$  than when heat capacities are simply ignored.

Heat capacity data is compiled for a wide variety of compounds, but for some compounds, the pure solid or liquid phase is experimentally difficult to assess. As a result,  $\Delta_{\text{fus}}C_{p,\text{salt}}$  (or  $\Delta_{\text{trs}}C_{p,\text{salt}}$  for a solid–solid transition) cannot be easily quantified. ChCl thermally decomposes upon heating, rendering its liquid phase inaccessible. We could measure ChCl’s melting point and enthalpy of fusion with fast scanning calorimetry for the first time,<sup>[10]</sup> but partial decomposition did not allow for the direct measurement of  $\Delta_{\text{fus}}C_{p,\text{ChCl}}$ .

Instead, we calculated  $\Delta_{\text{fus}}C_{p,\text{ChCl}}$  from the data measured by Lobo Ferreira *et al.*<sup>[11]</sup> By linearly extrapolating the heat capacity of various aqueous solutions ( $x_{\text{ChCl}} < 0.4$ ) to pure ChCl, they obtained  $C_{p,\text{ChCl}}^1 = 249 \pm 10 \text{ J}\cdot\text{mol}^{-1}\cdot\text{K}^{-1}$  at 298.15 K. The heat capacity of ChCl’s solid low-temperature polymorph  $\alpha$  was measured directly.<sup>[11]</sup> From interpolation, we calculated  $C_{p,\text{ChCl}}^\alpha = 51.3 + 0.528 * 298.15 = 208.7 \pm 1.8 \text{ J}\cdot\text{mol}^{-1}\cdot\text{K}^{-1}$ . They determined  $\Delta_{\text{trs}}C_{p,\text{ChCl}} = 20 \pm 3 \text{ J}\cdot\text{mol}^{-1}\cdot\text{K}^{-1}$  at 352.2 K,<sup>[11]</sup> and assuming it is temperature independent it follows that:

$$\Delta_{\text{fus}}C_{p,\text{ChCl}} = C_{p,\text{ChCl}}^1 - C_{p,\text{ChCl}}^\alpha - \Delta_{\text{trs}}C_{p,\text{ChCl}} = 20.3 \pm 10.6 \text{ J}\cdot\text{mol}^{-1}\cdot\text{K}^{-1}.$$

**Partial molar excess Gibbs energy of mixing.** Fig. S5 shows how the significant uncertainty in  $\Delta_{\text{fus}}C_{p,\text{ChCl}}$  translates into  $G_i^E$ . The lowest limit,  $\Delta_{\text{fus}}C_{p,\text{ChCl}} = 9.7 \text{ J}\cdot\text{mol}^{-1}\cdot\text{K}^{-1}$ , shows a discontinuity in  $G_{\text{ChCl}}^E$  at the solid–solid transition and is probably too low. The highest limit,  $\Delta_{\text{fus}}C_{p,\text{ChCl}} = 30.9 \text{ J}\cdot\text{mol}^{-1}\cdot\text{K}^{-1}$  visually shows consistent behaviour, with the Redlich–Kister fit of  $G_{\text{H}_2\text{O}}^E$  passing through the water activity-derived data. From this analysis, we expect the true value  $\Delta_{\text{fus}}C_{p,\text{ChCl}}$  to be close to or higher than  $20.3 \text{ J}\cdot\text{mol}^{-1}\cdot\text{K}^{-1}$ . Note that i) the fit is model-dependent, ii) the impact of uncertainty in the SLE data and ChCl’s melting point and fusion enthalpy are not shown, and iii) the composition range of  $G_{\text{H}_2\text{O}}^E$  and  $G_{\text{ChCl}}^E$  is limited.

**Partial excess molar enthalpy of mixing.**  $H_i^E$  data obtained from ITC experiments are unaffected by  $\Delta_{\text{trs}}C_{p,i}$ , but  $H_{\text{ChCl}}^E$  is significantly impacted because it is calculated from heats of dissolution corrected for the fusion properties (Eq. 5 in main text).  $H_{\text{ChCl}}^E$  acts as an anchor point for the ChCl-side of the Redlich–Kister fits of  $H_i^E$ , so the thermodynamic analysis of the enthalpy of mixing is also affected. The impact of  $\Delta_{\text{trs}}C_{p,i}$  on the fitted  $H_i^E$  is shown in Fig. S6.

**Total molar excess properties of mixing.**  $G_i^E$  and  $H_i^E$  are both affected by the uncertainty in  $\Delta_{\text{fus}}C_{p,\text{ChCl}}$ , so their integrated properties are as well. Fig. S7 and S8 show the impact on the total molar excess Gibbs energy and enthalpy of mixing. As mentioned earlier, the lower limit of  $\Delta_{\text{fus}}C_{p,\text{ChCl}} = 9.7 \text{ J}\cdot\text{mol}^{-1}\cdot\text{K}^{-1}$  shows thermodynamic inconsistencies in  $G_i^E$ , and results

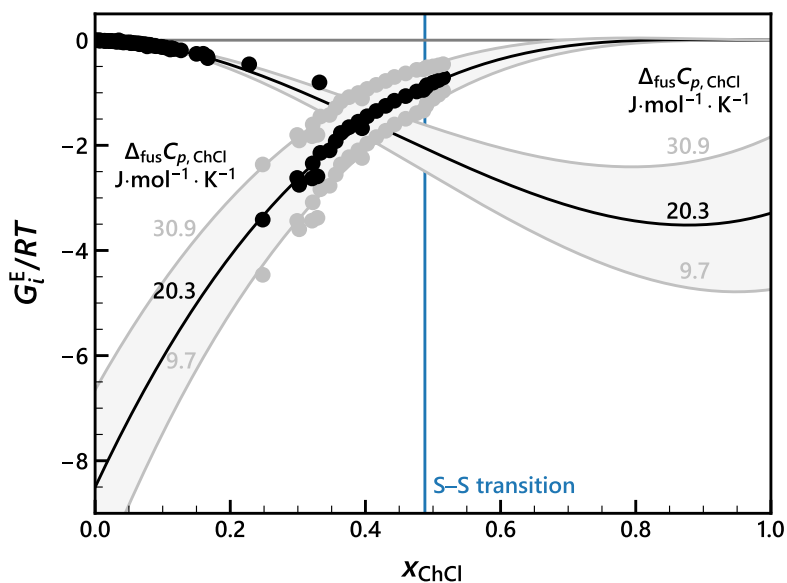

**Fig. S5** Normalised partial molar excess Gibbs energy of mixing ( $G_i^E$ ) for water + choline chloride (ChCl). Values were calculated from solid–liquid equilibrium (SLE) data using  $\Delta_{\text{fus}}C_{p,\text{ChCl}} = 20.3 \text{ J}\cdot\text{mol}^{-1}\cdot\text{K}^{-1}$  (black) and 9.7 or 30.9  $\text{J}\cdot\text{mol}^{-1}\cdot\text{K}^{-1}$  (grey) corresponding to the uncertainty limit for  $\Delta_{\text{fus}}C_{p,\text{ChCl}}$ . In all cases,  $G_i^E$  was fitted to a Redlich–Kister (RK) polynomial with two fit parameters. The composition at which the liquidus temperature corresponds to the solid–solid (S–S) transition temperature of ChCl is highlighted in blue.

in favourable  $H^E$  for all mixtures and a smaller—but significant—entropy contribution to  $G^E$ . The upper limit of  $\Delta_{\text{fus}}C_{p,\text{ChCl}} = 30.9 \text{ J}\cdot\text{mol}^{-1}\cdot\text{K}^{-1}$  results in favourable  $H^E$  for  $\text{H}_2\text{O} + \text{ChCl}$  only. The unfavourable interactions between EG + ChCl and 13PD + ChCl are overcome by a significant  $S^E$  contribution. In conclusion, more accurate and precise heat capacity data could significantly improve the calculated thermodynamics of mixing and their interpretation, especially for compounds with a large melting point depression.



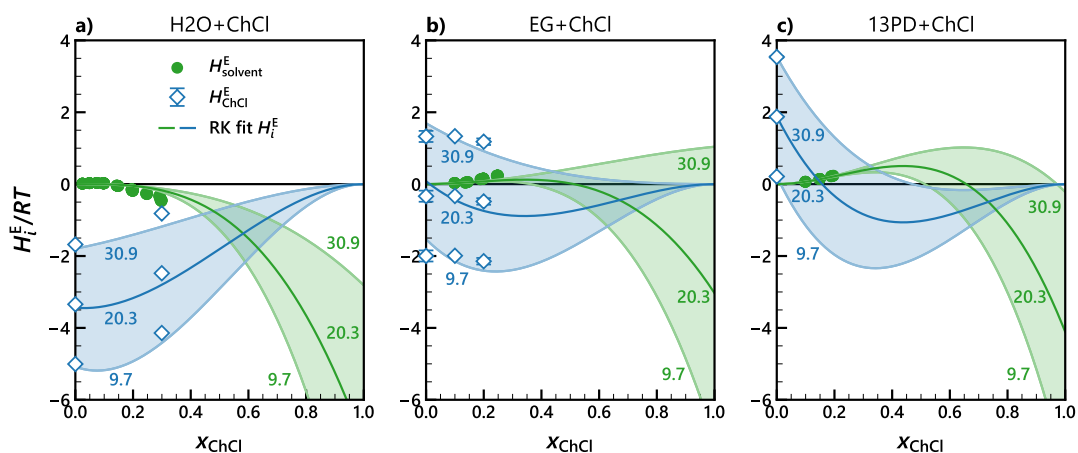

**Fig. S6** Normalised partial molar excess enthalpy of mixing ( $H_i^E/RT$ ) for **a**) water (H<sub>2</sub>O) + choline chloride (ChCl), **b**) ethylene glycol (EG) + ChCl, and **c**) 1,3-propanediol (13PD) + ChCl.  $H_{\text{ChCl}}^E$  (blue) was calculated from isothermal and quasi-adiabatic dissolution calorimetry using  $\Delta_{\text{fus}}C_{p,\text{ChCl}} = 20.3 \text{ J}\cdot\text{mol}^{-1}\cdot\text{K}^{-1}$  and 9.7 or 30.9  $\text{J}\cdot\text{mol}^{-1}\cdot\text{K}^{-1}$  corresponding to the uncertainty limit for  $\Delta_{\text{fus}}C_{p,\text{ChCl}}$ . In all cases,  $H_i^E$  was fitted to a Redlich–Kister (RK) polynomial with two fitting parameters.

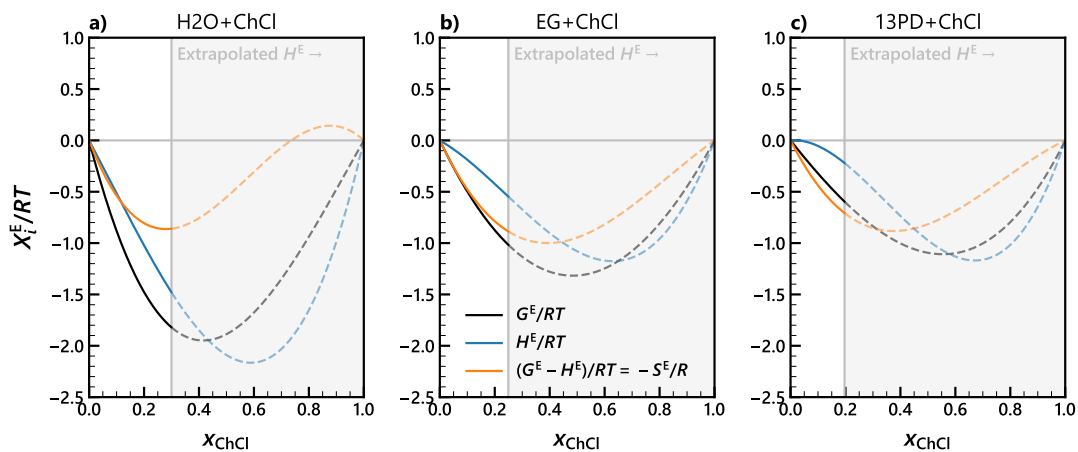

**Fig. S7** Normalised molar excess Gibbs energy and enthalpy of mixing ( $G^E/RT$  and  $H^E/RT$ ) for **a**) water (H<sub>2</sub>O) + choline chloride (ChCl), **b**) ethylene glycol (EG) + ChCl, and **c**) 1,3-propanediol (13PD) + ChCl.  $G^E$  (black) and  $H^E$  (blue) were calculated from first-order Redlich–Kister fits to their partial molar properties using  $\Delta_{\text{fus}}C_{p,\text{ChCl}} = 9.7 \text{ J}\cdot\text{mol}^{-1}\cdot\text{K}^{-1}$  corresponding to the lowest limit.

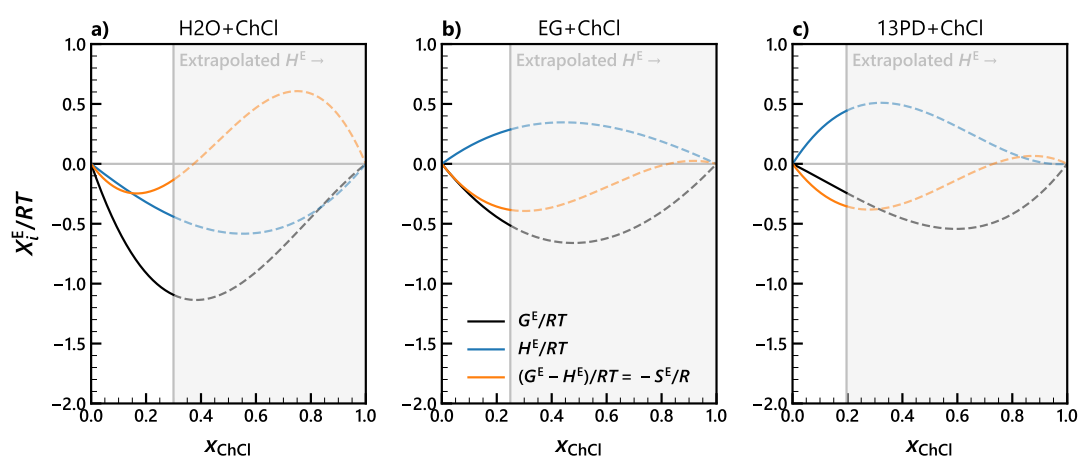

**Fig. S8** Normalised molar excess Gibbs energy and enthalpy of mixing ( $G^E/RT$  and  $H^E/RT$ ) for **a)** water (H<sub>2</sub>O) + choline chloride (ChCl), **b)** ethylene glycol (EG) + ChCl, and **c)** 1,3-propanediol (13PD) + ChCl.  $G^E$  (black) and  $H^E$  (blue) were calculated from first-order Redlich–Kister fits to their partial molar properties using  $\Delta_{\text{fus}}C_{p,\text{ChCl}} = 30.9 \text{ J}\cdot\text{mol}^{-1}\cdot\text{K}^{-1}$  corresponding to the highest limit.

### SI-3 Supplementary Figures

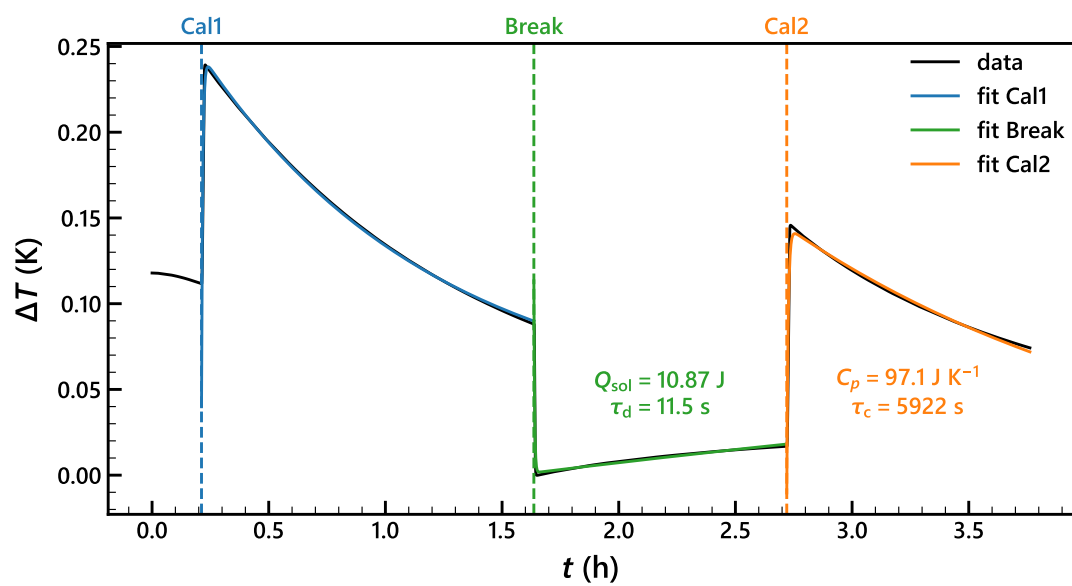

**Fig. S9** Temperature profile of the semi-adiabatic dissolution calorimeter for two calibration heat pulses of 15 J and the dissolution of choline chloride (ChCl) in pure H<sub>2</sub>O. The heat capacity ( $C_p$ ) and time constant ( $\tau_c$ ) of the calorimeter were fit to the second calibration to obtain the heat ( $Q_{\text{sol}}$ ) and time constant ( $\tau_d$ ) of dissolution.

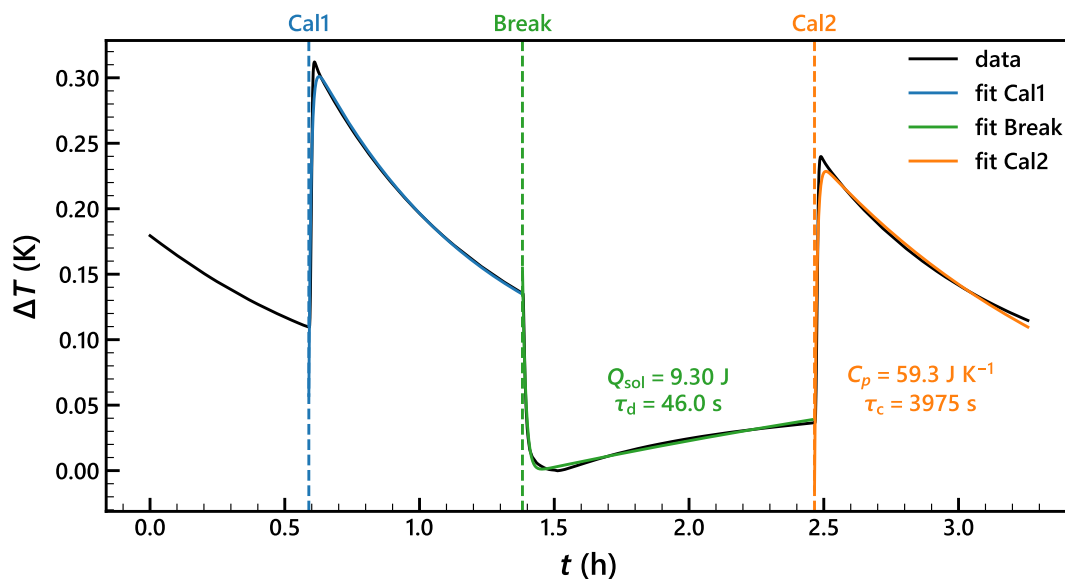

**Fig. S10** Temperature profile of the semi-adiabatic dissolution calorimeter for two calibration heat pulses of 15 J and the dissolution of choline chloride (ChCl) in pure H<sub>2</sub>O + ChCl at  $x_{\text{ChCl}}$ . The heat capacity ( $C_p$ ) and time constant ( $\tau_c$ ) of the calorimeter were fit to the second calibration to obtain the heat ( $Q_{\text{sol}}$ ) and time constant ( $\tau_d$ ) of dissolution.

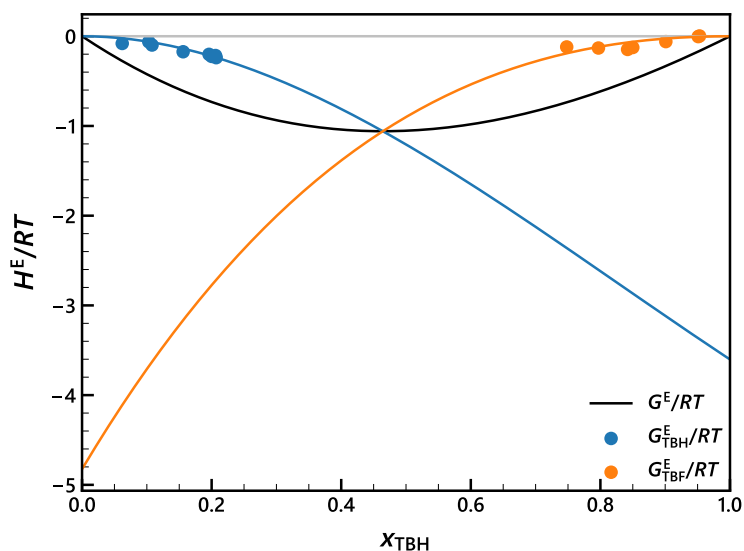

**Fig. S11** Normalised partial molar Gibbs excess energies ( $G_i^E/RT$ ) as calculated from the solid–liquid equilibrium data and fusion properties for tert-butyl alcohol (TBH) + perfluoro-tert-butyl alcohol (TBF) as published by Vaz *et al.*<sup>[12]</sup>. Only the points in equilibrium with the pure solid were fitted to a first-order Redlich–Kister polynomial to obtain the equimolar total normalised molar Gibbs excess energy  $G^E(x_{\text{TBF}} = 0.5)/RT$ .

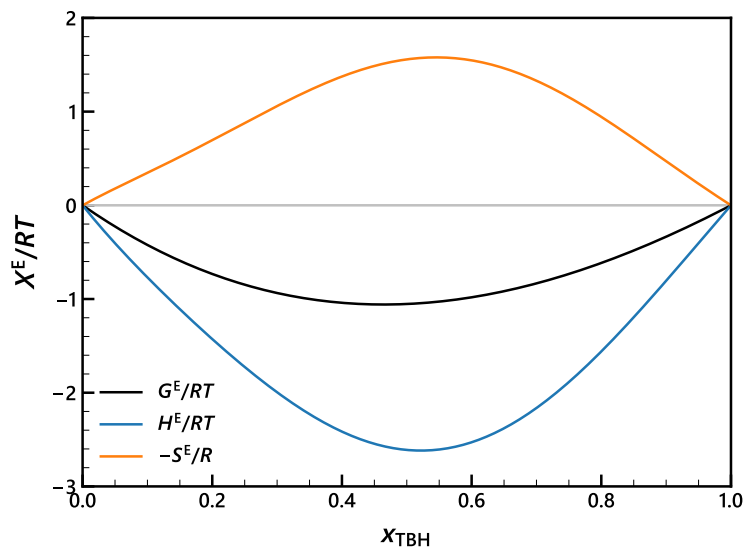

**Fig. S12** Normalised molar excess properties as calculated from Fig. S11 and the Redlich–Kister parameters for  $H^E$  published by Vaz *et al.*<sup>[12]</sup>.

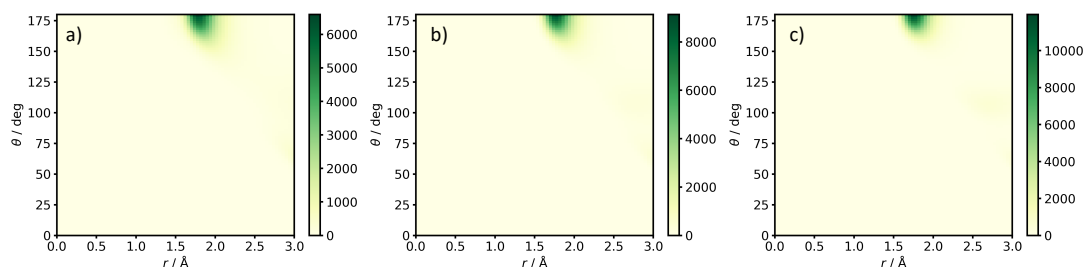

**Fig. S13** Combined angle-distance distribution function (CDF) of the  $H_2O$ - $H_2O$  hydrogen bond at a)  $x_{CHCl} = 0.0$  (pure water), b)  $x_{CHCl} = 0.1$  and c)  $x_{CHCl} = 0.3$ . The intensities in the lateral color bar represent the counts.

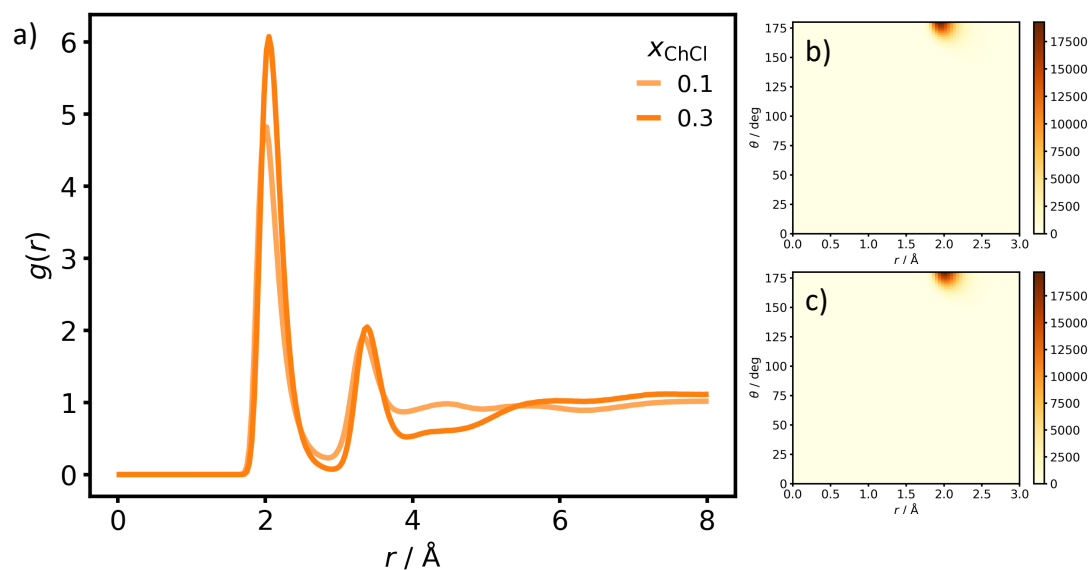

**Fig. S14** a) Radial distribution functions (RDFs) of the H $\cdots$ Cl distance between the H atom of H<sub>2</sub>O and the anion at different concentrations of salt. b) Combined angle-distance distribution function (CDF) of H<sub>2</sub>O and Cl at  $x_{\text{ChCl}} = 0.1$ . c) Combined angle-distance distribution function (CDF) of H<sub>2</sub>O and Cl at  $x_{\text{ChCl}} = 0.3$ . The intensities in the lateral color bar represent the counts.

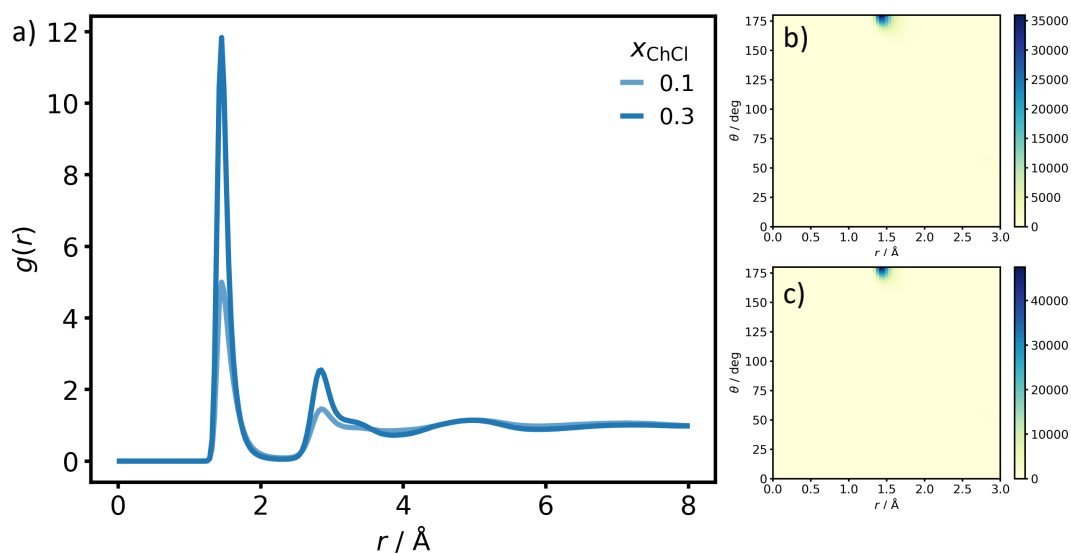

**Fig. S15** a) Radial distribution functions (RDFs) of the H $\cdots$ O distance between the H atom of H<sub>2</sub>O and the O atom of choline at different concentrations of salt. b) Combined angle-distance distribution function (CDF) of H<sub>2</sub>O and the O atom of the cation at  $x_{\text{ChCl}} = 0.1$ . c) Combined angle-distance distribution function (CDF) of H<sub>2</sub>O and the O atom of the cation at  $x_{\text{ChCl}} = 0.3$ . The intensities in the lateral color bar represent the counts.

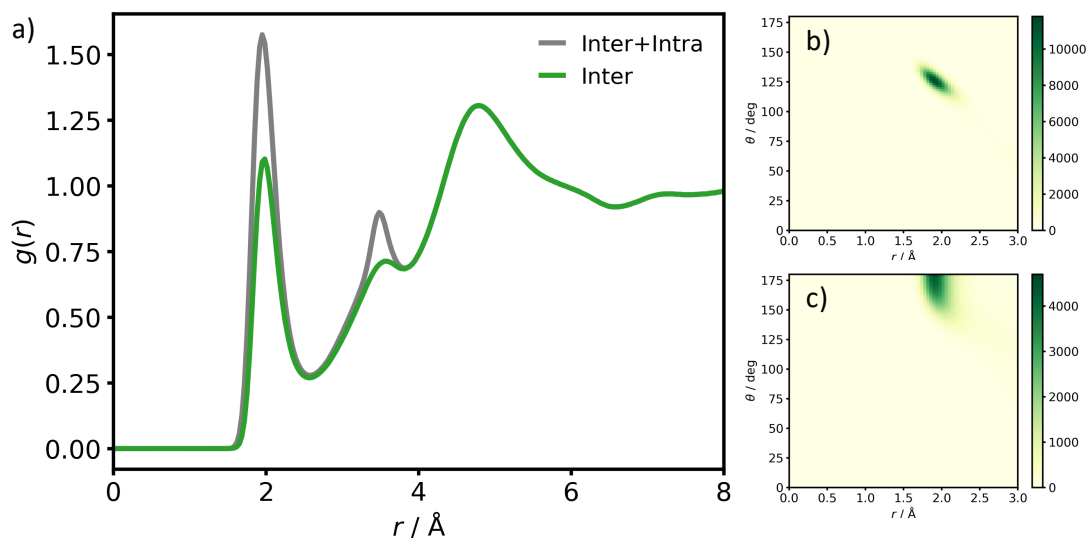

**Fig. S16** a) Radial distribution functions (RDFs) of the inter- and intra-molecular H $\cdots$ O distance between the hydroxyl groups of EG. b) Combined angle-distance distribution function (CDF) of the intra-molecular H-bond in EG. c) Combined angle-distance distribution function (CDF) of the intra-molecular H-bond in EG. The intensities in the lateral color bar represent the counts.

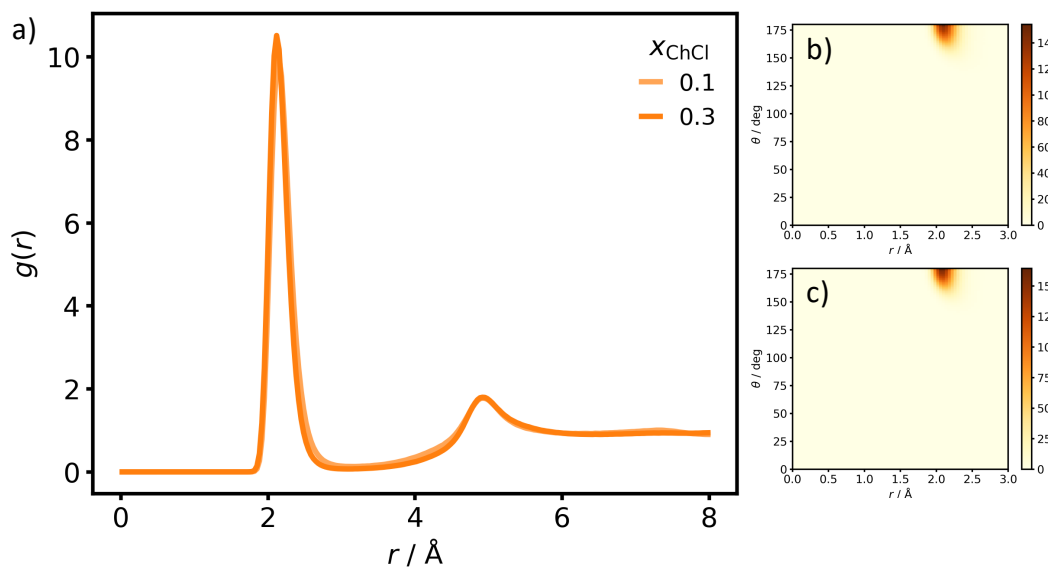

**Fig. S17** a) Radial distribution functions (RDFs) of the H $\cdots$ Cl distance between the hydroxyl groups of EG and the anion at different concentrations of salt. b) Combined angle-distance distribution function (CDF) of the hydroxyl group of EG and Cl at  $x_{\text{ChCl}} = 0.1$  c) Combined angle-distance distribution function (CDF) of the hydroxyl group of EG and Cl at  $x_{\text{ChCl}} = 0.3$ . The intensities in the lateral color bar represent the counts.

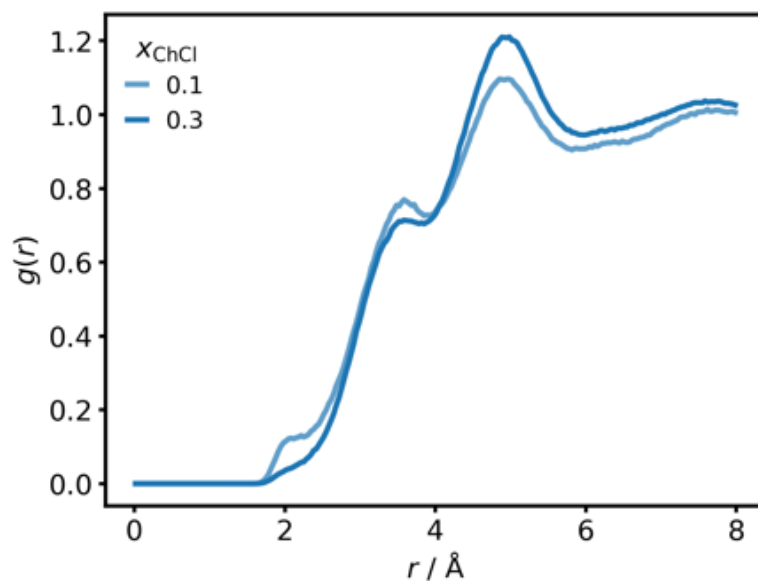

**Fig. S18** Radial distribution functions (RDFs) of the intermolecular H $\cdots$ O distance between the hydroxyl groups of EG at different concentrations of salt.

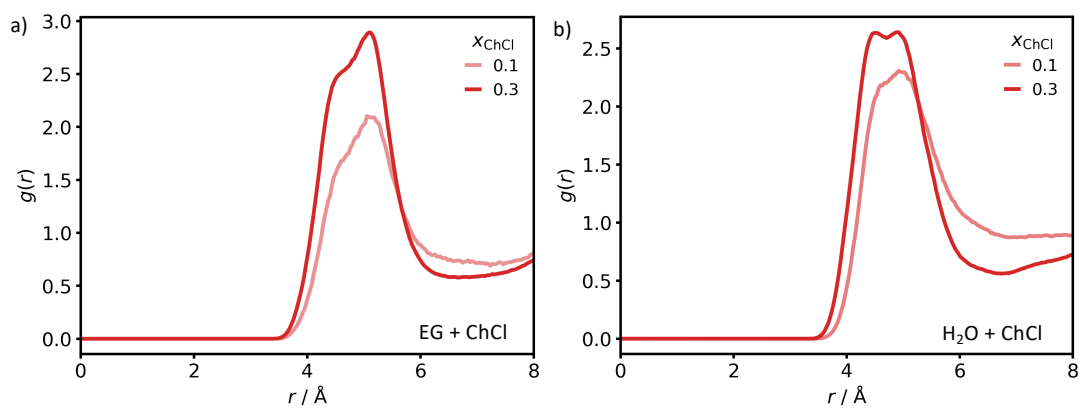

**Fig. S19** Radial distribution functions (RDFs) at different concentrations of ChCl between the centers of mass of Ch and Cl a) in EG and b) in H<sub>2</sub>O.



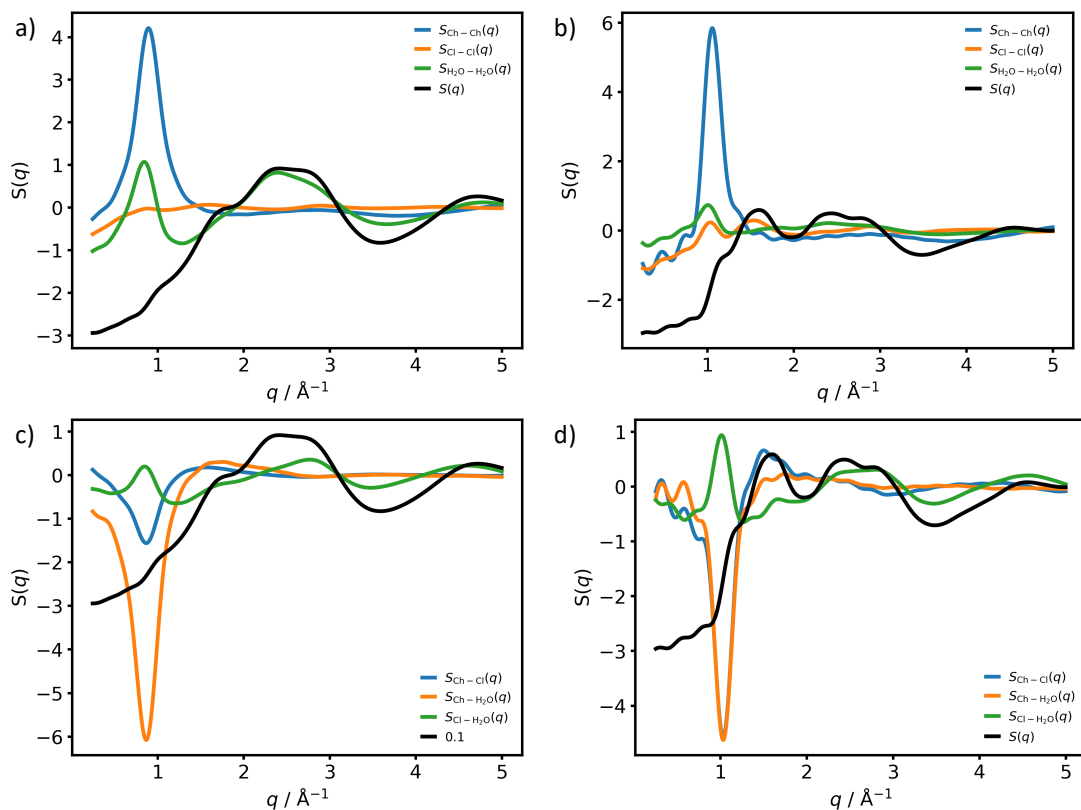

**Fig. S20** Simulated X-ray static structure factors of  $\text{H}_2\text{O} + \text{ChCl}$ . Total  $S(q)$  (black) and partial  $S_{\alpha-\beta}(q)$  (colored). a-b) Partial structure factors of like-like correlations, Ch - Ch (blue), Cl - Cl (orange) and  $\text{H}_2\text{O} - \text{H}_2\text{O}$  (green), at  $x_{\text{ChCl}} = 0.1$  and  $x_{\text{ChCl}} = 0.3$ , respectively. c-d) Partial structure factors of unlike correlations between Ch - Cl (blue), Ch -  $\text{H}_2\text{O}$  (orange) and Cl -  $\text{H}_2\text{O}$  (green).

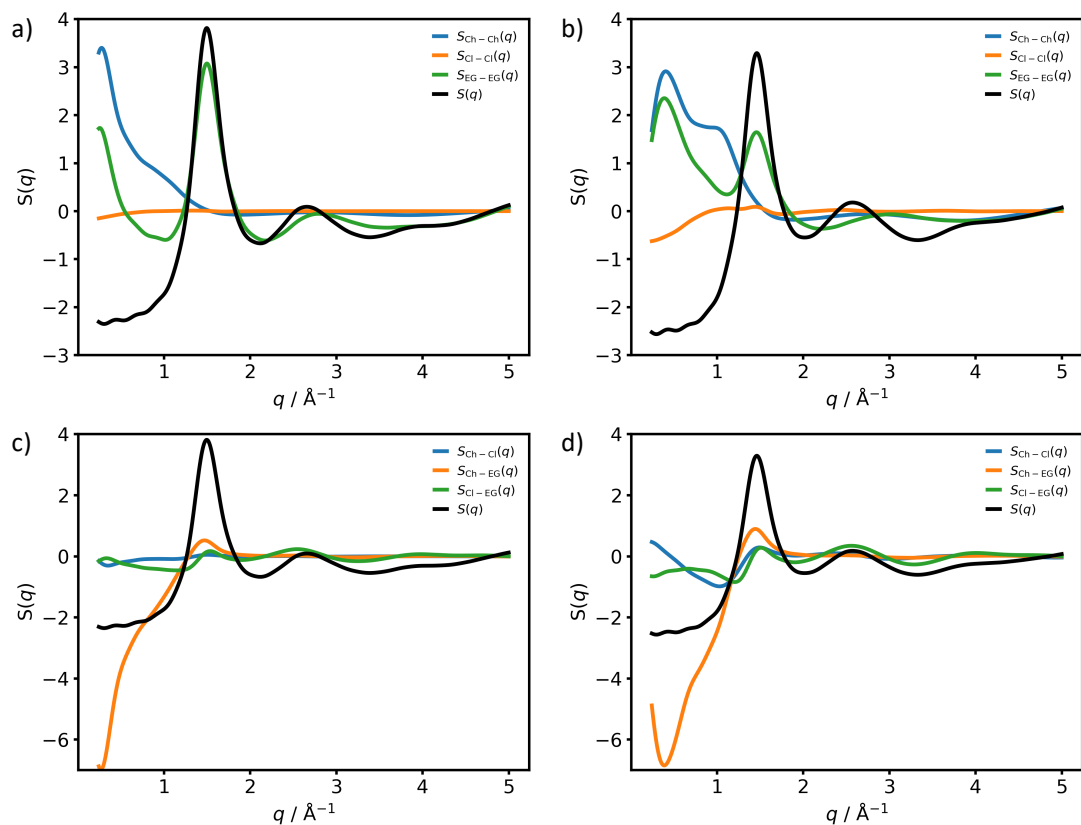

**Fig. S21** Simulated X-ray static structure factors of EG+ChCl. Total  $S(q)$  (black) and partial  $S_{\alpha-\beta}(q)$  (colored). a-b) Partial structure factors of like-like correlations, Ch – Ch (blue), Cl – Cl (orange) and EG – EG (green), at  $x_{\text{ChCl}} = 0.1$  and  $x_{\text{ChCl}} = 0.3$ , respectively. c-d) Partial structure factors of unlike correlations between Ch – Cl (blue), Ch – EG (orange) and Cl – EG (green).

## SI–4 Supplementary Tables

**Table S4** Thermophysical properties of the pure component phase transitions used to calculate  $G_i^E$  from solid–liquid equilibrium data.  $T_{\text{trs}}$  is the transition temperature,  $\Delta_{\text{trs}}H$  is the enthalpy of transition, and  $\Delta_{\text{trs}}C_p$  is the heat capacity change of transition at constant pressure. DSC refers to differential scanning calorimetry measurements from this work.

| component        | transition  | $T_{\text{trs}}$<br>K | $\Delta_{\text{trs}}H$<br>$\text{J}\cdot\text{mol}^{-1}$ | $\Delta_{\text{trs}}C_p$<br>$\text{J}\cdot\text{mol}^{-1}\cdot\text{K}^{-1}$ | Ref          |
|------------------|-------------|-----------------------|----------------------------------------------------------|------------------------------------------------------------------------------|--------------|
| water            | fusion      | 273.16                | 6008                                                     | 38.2                                                                         | [13]         |
| ethylene glycol  | fusion      | 260.3                 | 9500                                                     | 44                                                                           | DSC, [14–16] |
| choline chloride | fusion      | 687                   | 13800                                                    | 20.3                                                                         | [10,11]      |
|                  | solid–solid | 352.2                 | 16300                                                    | 20.0                                                                         | [11]         |

**Table S5** Normalised partial molar excess Gibbs energy of mixing of water ( $G_{\text{H}_2\text{O}}^E/RT$ ) at 298.15 K calculated from osmotic coefficient data on molality basis ( $\Phi_m$ ) as a function of choline chloride mole fraction ( $x_{\text{ChCl}}$ ) published by Macaskill *et al.* [17].

| $x_{\text{ChCl}}$ | $\Phi_m$ | $G_{\text{H}_2\text{O}}^E/RT$ | $x_{\text{ChCl}}$ | $\Phi_m$ | $G_{\text{H}_2\text{O}}^E/RT$ |
|-------------------|----------|-------------------------------|-------------------|----------|-------------------------------|
| 0.00266           | 0.8979   | -0.00213                      | 0.05136           | 0.9060   | -0.04538                      |
| 0.00575           | 0.8760   | -0.00436                      | 0.05320           | 0.9123   | -0.04786                      |
| 0.00790           | 0.8641   | -0.00583                      | 0.05777           | 0.9257   | -0.05401                      |
| 0.01397           | 0.8526   | -0.01009                      | 0.06213           | 0.9383   | -0.06018                      |
| 0.01721           | 0.8525   | -0.01250                      | 0.06416           | 0.9422   | -0.06288                      |
| 0.02153           | 0.8537   | -0.01580                      | 0.06666           | 0.9531   | -0.06715                      |
| 0.02193           | 0.8539   | -0.01611                      | 0.06719           | 0.9508   | -0.06742                      |
| 0.02405           | 0.8535   | -0.01772                      | 0.07223           | 0.9652   | -0.07532                      |
| 0.02649           | 0.8580   | -0.01985                      | 0.07446           | 0.9741   | -0.07935                      |
| 0.02934           | 0.8632   | -0.02240                      | 0.07790           | 0.9907   | -0.08629                      |
| 0.03134           | 0.8663   | -0.02422                      | 0.08225           | 1.0056   | -0.09441                      |
| 0.03449           | 0.8698   | -0.02704                      | 0.08800           | 1.0233   | -0.10536                      |
| 0.03743           | 0.8766   | -0.03002                      | 0.09770           | 1.0527   | -0.12516                      |
| 0.04020           | 0.8814   | -0.03281                      | 0.10462           | 1.0754   | -0.14080                      |
| 0.04757           | 0.8999   | -0.04116                      | 0.11374           | 1.1030   | -0.16237                      |

**Table S6** Normalised partial molar excess Gibbs energy of mixing of water ( $G_{\text{H}_2\text{O}}^{\text{E}}/RT$ ) at 298.15 K calculated from water activity data ( $a_{\text{H}_2\text{O}}$ ) as a function of choline chloride mole fraction ( $x_{\text{ChCl}}$ ) published by Khan *et al.*<sup>[18]</sup>.

| $x_{\text{ChCl}}$ | $a_{\text{H}_2\text{O}}$ | $G_{\text{H}_2\text{O}}^{\text{E}}/RT$ |
|-------------------|--------------------------|----------------------------------------|
| 0.015             | 0.972                    | -0.013                                 |
| 0.031             | 0.944                    | -0.025                                 |
| 0.052             | 0.906                    | -0.046                                 |
| 0.080             | 0.844                    | -0.087                                 |
| 0.113             | 0.762                    | -0.152                                 |
| 0.160             | 0.648                    | -0.259                                 |
| 0.228             | 0.488                    | -0.459                                 |
| 0.332             | 0.299                    | -0.803                                 |

**Table S7** Solid–liquid equilibrium data of water (H<sub>2</sub>O) + choline chloride (ChCl). Tabulated are the liquidus temperature ( $T_{\text{liq}}$ ) and the normalised partial molar excess Gibbs energy ( $G_i^E/RT$ ) calculated from it as a function of ChCl mole fraction ( $x_{\text{ChCl}}$ ). The literature source (Ref) or differential scanning calorimetry (DSC, this work) is mentioned for the  $T_{\text{liq}}$  data, and  $G_{\text{ChCl}}^E/RT$  was calculated using four different values for ChCl the heat capacity change of fusion ( $\Delta C_p$  in J·mol<sup>-1</sup>·K<sup>-1</sup>).

| $x_{\text{ChCl}}$ | $T_{\text{liq}}$<br>K | Ref  | $G_{\text{H}_2\text{O}}^E/RT$ | $x_{\text{ChCl}}$ | $T_{\text{liq}}$<br>K | Ref  | $G_{\text{ChCl}}^E/RT$ |        |        |        | $\leftarrow \Delta C_p$ |
|-------------------|-----------------------|------|-------------------------------|-------------------|-----------------------|------|------------------------|--------|--------|--------|-------------------------|
|                   |                       |      |                               |                   |                       |      | 0                      | 9.7    | 20.3   | 30.9   |                         |
| 0.0350            | 269.2                 | DSC  | -0.003                        | 0.3470            | 285.5                 | DSC  | -3.423                 | -2.769 | -2.096 | -1.422 |                         |
| 0.0000            | 273.1                 | [3]  | -0.000                        | 0.3636            | 298.1                 | [3]  | -2.932                 | -2.363 | -1.765 | -1.166 |                         |
| 0.0070            | 271.7                 | [11] | -0.007                        | 0.3757            | 303.1                 | [3]  | -2.764                 | -2.226 | -1.654 | -1.083 |                         |
| 0.0140            | 270.5                 | [11] | -0.012                        | 0.3894            | 308.1                 | [3]  | -2.606                 | -2.096 | -1.551 | -1.005 |                         |
| 0.0230            | 269.1                 | [11] | -0.016                        | 0.4025            | 313.1                 | [3]  | -2.452                 | -1.968 | -1.447 | -0.927 |                         |
| 0.0320            | 267.3                 | [11] | -0.024                        | 0.4160            | 318.1                 | [3]  | -2.303                 | -1.843 | -1.347 | -0.850 |                         |
| 0.0420            | 264.2                 | [11] | -0.044                        | 0.4299            | 323.1                 | [3]  | -2.160                 | -1.723 | -1.249 | -0.775 |                         |
| 0.0540            | 261.6                 | [11] | -0.057                        | 0.4429            | 328.1                 | [3]  | -2.019                 | -1.604 | -1.152 | -0.699 |                         |
| 0.0660            | 258.3                 | [11] | -0.077                        | 0.4595            | 333.1                 | [3]  | -1.890                 | -1.495 | -1.063 | -0.632 |                         |
| 0.0830            | 253.9                 | [11] | -0.101                        | 0.4758            | 338.1                 | [3]  | -1.764                 | -1.388 | -0.976 | -0.565 |                         |
| 0.0900            | 251.8                 | [11] | -0.114                        | 0.4857            | 343.1                 | [3]  | -1.699                 | -1.340 | -0.947 | -0.555 |                         |
| 0.1000            | 249.0                 | [11] | -0.131                        | 0.2480            | 238.4                 | [11] | -5.592                 | -4.463 | -3.414 | -2.364 |                         |
| 0.1170            | 243.3                 | [11] | -0.168                        | 0.2990            | 264.8                 | [11] | -4.265                 | -3.437 | -2.620 | -1.803 |                         |
| 0.1270            | 239.6                 | [11] | -0.193                        | 0.3020            | 261.3                 | [11] | -4.458                 | -3.596 | -2.752 | -1.907 |                         |
| 0.1500            | 230.2                 | [11] | -0.260                        | 0.3210            | 266.6                 | [11] | -4.244                 | -3.433 | -2.630 | -1.826 |                         |
| 0.1660            | 223.3                 | [11] | -0.309                        | 0.3220            | 275.3                 | [11] | -3.818                 | -3.084 | -2.343 | -1.603 |                         |
| 0.0769            | 252.9                 | [19] | -0.117                        | 0.3290            | 268.5                 | [11] | -4.172                 | -3.379 | -2.590 | -1.801 |                         |
| 0.1111            | 243.1                 | [19] | -0.177                        | 0.3560            | 292.1                 | [11] | -3.162                 | -2.554 | -1.921 | -1.288 |                         |
| 0.1667            | 219.9                 | [19] | -0.341                        | 0.3950            | 304.2                 | [11] | -2.773                 | -2.241 | -1.675 | -1.109 |                         |
| 0.0902            | 254.3                 | [20] | -0.089                        | 0.4900            | 353.2                 | [11] | -1.570                 | -1.244 | -0.887 | -0.530 |                         |
| 0.1238            | 239.2                 | [20] | -0.201                        | 0.4910            | 358.2                 | [11] | -1.506                 | -1.195 | -0.855 | -0.515 |                         |
| 0.1419            | 233.7                 | [20] | -0.235                        | 0.5000            | 368.2                 | [11] | -1.399                 | -1.116 | -0.808 | -0.499 |                         |
| 0.1665            | 218.3                 | [20] | -0.357                        | 0.5080            | 378.2                 | [11] | -1.295                 | -1.039 | -0.759 | -0.479 |                         |
|                   |                       |      |                               | 0.5150            | 388.2                 | [11] | -1.196                 | -0.964 | -0.710 | -0.457 |                         |
|                   |                       |      |                               | 0.3333            | 282.6                 | [19] | -3.510                 | -2.835 | -2.144 | -1.452 |                         |
|                   |                       |      |                               | 0.3320            | 278.2                 | [20] | -3.711                 | -3.001 | -2.281 | -1.560 |                         |

**Table S8** Solid–liquid equilibrium data of ethylene glycol (EG) + choline chloride (ChCl). Tabulated are the liquidus temperature ( $T_{\text{liq}}$ ) and the normalised partial molar excess Gibbs energy ( $G_i^{\text{E}}/RT$ ) calculated from it as a function of ChCl mole fraction ( $x_{\text{ChCl}}$ ). The literature source (Ref) or differential scanning calorimetry (DSC, this work) is mentioned for the  $T_{\text{liq}}$  data, and  $G_{\text{ChCl}}^{\text{E}}/RT$  was calculated using four different values for ChCl the heat capacity change of fusion ( $\Delta C_p$  in  $\text{J}\cdot\text{mol}^{-1}\cdot\text{K}^{-1}$ ).

| $x_{\text{ChCl}}$ | $T_{\text{liq}}$<br>K | Ref  | $G_{\text{EG}}^{\text{E}}/RT$ | $x_{\text{ChCl}}$ | $T_{\text{liq}}$<br>K | Ref  | $G_{\text{ChCl}}^{\text{E}}/RT$ |        |        |        | $\leftarrow \Delta C_p$ |
|-------------------|-----------------------|------|-------------------------------|-------------------|-----------------------|------|---------------------------------|--------|--------|--------|-------------------------|
|                   |                       |      |                               |                   |                       |      | 0                               | 9.7    | 20.3   | 30.9   |                         |
| 0.0373            | 256.7                 | DSC  | -0.047                        | 0.1755            | 252.3                 | DSC  | -4.625                          | -3.634 | -2.714 | -1.795 |                         |
| 0.0749            | 254.0                 | DSC  | -0.063                        | 0.1917            | 256.5                 | DSC  | -4.478                          | -3.535 | -2.651 | -1.768 |                         |
| 0.0996            | 251.5                 | DSC  | -0.090                        | 0.2498            | 274.7                 | DSC  | -3.812                          | -3.049 | -2.304 | -1.559 |                         |
| 0.1501            | 247.7                 | DSC  | -0.115                        | 0.3035            | 291.4                 | DSC  | -3.248                          | -2.619 | -1.981 | -1.344 |                         |
| 0.0000            | 260.3                 | [21] | -0.010                        | 0.3538            | 307.6                 | DSC  | -2.749                          | -2.225 | -1.676 | -1.128 |                         |
| 0.0440            | 260.7                 | [21] | 0.043                         | 0.3897            | 329.6                 | DSC  | -2.059                          | -1.645 | -1.199 | -0.753 |                         |
| 0.0930            | 255.8                 | [21] | -0.006                        | 0.4515            | 342.9                 | DSC  | -1.780                          | -1.419 | -1.026 | -0.633 |                         |
| 0.1150            | 254.6                 | [21] | -0.007                        | 0.1850            | 257.2                 | [21] | -4.406                          | -3.470 | -2.592 | -1.714 |                         |
| 0.1370            | 251.5                 | [21] | -0.047                        | 0.2170            | 265.3                 | [21] | -4.136                          | -3.285 | -2.471 | -1.658 |                         |
| 0.1610            | 251.6                 | [21] | -0.017                        | 0.2480            | 275.6                 | [21] | -3.759                          | -3.005 | -2.266 | -1.527 |                         |
|                   |                       |      |                               | 0.2910            | 288.7                 | [21] | -3.323                          | -2.674 | -2.020 | -1.367 |                         |
|                   |                       |      |                               | 0.3330            | 304.9                 | [21] | -2.792                          | -2.251 | -1.689 | -1.127 |                         |

**Table S9** Solid–liquid equilibrium data of 1,3-propanediol + choline chloride (ChCl). Tabulated are the liquidus temperature ( $T_{\text{liq}}$ ) and the normalised partial molar excess Gibbs energy ( $G_i^{\text{E}}/RT$ ) calculated from it as a function of ChCl mole fraction ( $x_{\text{ChCl}}$ ). The  $T_{\text{liq}}$  data was measured with differential scanning calorimetry (DSC) in this work, and  $G_{\text{ChCl}}^{\text{E}}/RT$  was calculated using four different values for ChCl the heat capacity change of fusion ( $\Delta C_p$  in  $\text{J}\cdot\text{mol}^{-1}\cdot\text{K}^{-1}$ ).

| $x_{\text{ChCl}}$ | $T_{\text{liq}}$<br>K | $G_{\text{ChCl}}^{\text{E}}/RT$ |        |        |        | $\leftarrow \Delta C_p$ |
|-------------------|-----------------------|---------------------------------|--------|--------|--------|-------------------------|
|                   |                       | 0                               | 9.7    | 20.3   | 30.9   |                         |
| 0.1000            | 252.7                 | -4.040                          | -3.054 | -2.138 | -1.222 |                         |
| 0.1250            | 259.1                 | -3.913                          | -2.997 | -2.135 | -1.272 |                         |
| 0.1500            | 266.5                 | -3.707                          | -2.868 | -2.063 | -1.258 |                         |
| 0.2000            | 279.0                 | -3.383                          | -2.657 | -1.942 | -1.227 |                         |
| 0.3000            | 301.7                 | -2.813                          | -2.253 | -1.674 | -1.095 |                         |

**Table S10** Isothermal titration calorimetry data for water (1) + choline chloride (2) at 298.15 K. Where  $n_i$  are the number of moles of  $i$  in the cell (subscript c) or syringe (subscript s), and  $Q$  is the heat flow integral for each injection.

| $x_{2,c}$ | $n_{1,c}$<br>mmol | $n_{2,c}$<br>mmol | $n_{1,s}$<br>$\mu\text{mol}$ | $n_{2,s}$<br>$\mu\text{mol}$ | $Q$<br>mJ |
|-----------|-------------------|-------------------|------------------------------|------------------------------|-----------|
| 0.0002    | 49.898            | 0.012             | 28.038                       | 11.999                       | 19.99     |
| 0.0005    | 49.926            | 0.024             | 13.835                       | 5.920                        | 9.79      |
| 0.0006    | 49.939            | 0.030             | 56.459                       | 24.161                       | 37.93     |
| 0.0011    | 49.996            | 0.054             | 13.835                       | 5.920                        | 9.11      |
| 0.0012    | 50.010            | 0.060             | 13.835                       | 5.920                        | 8.76      |
| 0.0013    | 50.024            | 0.066             | 13.835                       | 5.920                        | 8.61      |
| 0.0014    | 50.037            | 0.072             | 13.835                       | 5.920                        | 8.14      |
| 0.0016    | 50.051            | 0.078             | 13.835                       | 5.920                        | 8.07      |
| 0.0017    | 50.065            | 0.084             | 13.835                       | 5.920                        | 8.05      |
| 0.0018    | 50.079            | 0.090             | 13.835                       | 5.920                        | 7.77      |
| 0.0002    | 48.127            | 0.012             | 28.038                       | 11.999                       | 21.75     |
| 0.0005    | 48.155            | 0.024             | 28.038                       | 11.999                       | 21.38     |
| 0.0007    | 48.183            | 0.036             | 28.038                       | 11.999                       | 21.80     |
| 0.0010    | 48.211            | 0.048             | 28.038                       | 11.999                       | 21.16     |
| 0.0012    | 48.239            | 0.060             | 28.038                       | 11.999                       | 20.08     |
| 0.0015    | 48.267            | 0.072             | 28.038                       | 11.999                       | 19.26     |
| 0.0017    | 48.295            | 0.084             | 28.038                       | 11.999                       | 18.59     |
| 0.0020    | 48.323            | 0.096             | 28.038                       | 11.999                       | 18.62     |
| 0.0022    | 48.351            | 0.108             | 28.038                       | 11.999                       | 17.87     |
| 0.0025    | 48.379            | 0.120             | 28.038                       | 11.999                       | 17.25     |
| 0.0027    | 48.407            | 0.132             | 28.038                       | 11.999                       | 16.49     |
| 0.0030    | 48.435            | 0.144             | 28.038                       | 11.999                       | 16.16     |
| 0.0032    | 48.463            | 0.156             | 28.038                       | 11.999                       | 15.46     |
| 0.0035    | 48.491            | 0.168             | 28.038                       | 11.999                       | 14.79     |
| 0.0037    | 48.519            | 0.180             | 28.038                       | 11.999                       | 14.37     |
| 0.0039    | 48.547            | 0.192             | 28.038                       | 11.999                       | 14.26     |
| 0.0042    | 48.575            | 0.204             | 28.038                       | 11.999                       | 13.21     |
| 0.0044    | 48.603            | 0.216             | 28.038                       | 11.999                       | 12.66     |
| 0.0047    | 48.632            | 0.228             | 28.038                       | 11.999                       | 12.02     |
| 0.0049    | 48.660            | 0.240             | 28.038                       | 11.999                       | 11.70     |
| 0.0051    | 48.688            | 0.252             | 28.038                       | 11.999                       | 11.12     |
| 0.0054    | 48.716            | 0.264             | 28.038                       | 11.999                       | 10.55     |
| 0.0056    | 48.744            | 0.276             | 28.038                       | 11.999                       | 10.20     |
| 0.0059    | 48.772            | 0.288             | 28.038                       | 11.999                       | 10.50     |
| 0.0061    | 48.800            | 0.300             | 28.038                       | 11.999                       | 9.15      |
| 0.0063    | 48.828            | 0.312             | 28.038                       | 11.999                       | 8.80      |
| 0.0066    | 48.856            | 0.324             | 28.038                       | 11.999                       | 8.22      |
| 0.0068    | 48.884            | 0.336             | 28.038                       | 11.999                       | 7.93      |
| 0.0071    | 48.912            | 0.348             | 28.038                       | 11.999                       | 7.47      |
| 0.0073    | 48.940            | 0.360             | 28.038                       | 11.999                       | 7.08      |
| 0.0075    | 48.968            | 0.372             | 28.038                       | 11.999                       | 6.68      |
| 0.0242    | 42.667            | 1.057             | 165.533                      | 0                            | 4.98      |

Continued on next page

Table S10 – continued from previous page

| $x_{2,c}$ | $n_{1,c}$<br>mmol | $n_{2,c}$<br>mmol | $n_{1,s}$<br>$\mu\text{mol}$ | $n_{2,s}$<br>$\mu\text{mol}$ | $Q$<br>mJ |
|-----------|-------------------|-------------------|------------------------------|------------------------------|-----------|
| 0.0243    | 42.501            | 1.057             | 165.533                      | 0                            | 5.38      |
| 0.0244    | 42.336            | 1.057             | 165.533                      | 0                            | 5.62      |
| 0.0245    | 42.170            | 1.057             | 165.533                      | 0                            | 5.11      |
| 0.0245    | 42.005            | 1.057             | 165.533                      | 0                            | 7.09      |
| 0.0246    | 41.839            | 1.057             | 165.533                      | 0                            | 5.29      |
| 0.0247    | 41.674            | 1.057             | 165.533                      | 0                            | 5.36      |
| 0.0248    | 41.508            | 1.057             | 165.533                      | 0                            | 5.29      |
| 0.0249    | 41.343            | 1.057             | 165.533                      | 0                            | 5.29      |
| 0.0478    | 37.219            | 1.870             | 137.686                      | 0                            | 9.12      |
| 0.0480    | 37.081            | 1.870             | 137.686                      | 0                            | 9.11      |
| 0.0482    | 36.943            | 1.870             | 137.686                      | 0                            | 9.17      |
| 0.0483    | 36.806            | 1.870             | 137.686                      | 0                            | 9.18      |
| 0.0485    | 36.668            | 1.870             | 137.686                      | 0                            | 9.23      |
| 0.0487    | 36.530            | 1.870             | 137.686                      | 0                            | 9.67      |
| 0.0489    | 36.393            | 1.870             | 137.686                      | 0                            | 8.38      |
| 0.0490    | 36.255            | 1.870             | 137.686                      | 0                            | 9.51      |
| 0.0492    | 36.117            | 1.870             | 137.686                      | 0                            | 9.39      |
| 0.0494    | 35.979            | 1.870             | 137.686                      | 0                            | 9.45      |
| 0.0496    | 35.842            | 1.870             | 137.686                      | 0                            | 9.37      |
| 0.0498    | 35.704            | 1.870             | 137.686                      | 0                            | 8.96      |
| 0.0738    | 100.681           | 8.025             | 275.372                      | 0                            | 23.60     |
| 0.0740    | 100.406           | 8.025             | 275.372                      | 0                            | 23.04     |
| 0.0742    | 100.130           | 8.025             | 275.372                      | 0                            | 23.19     |
| 0.0744    | 99.855            | 8.025             | 275.372                      | 0                            | 23.98     |
| 0.0746    | 99.580            | 8.025             | 275.372                      | 0                            | 23.07     |
| 0.0748    | 99.304            | 8.025             | 275.372                      | 0                            | 24.51     |
| 0.0750    | 99.029            | 8.025             | 275.372                      | 0                            | 23.67     |
| 0.0939    | 28.623            | 2.966             | 109.839                      | 0                            | 7.17      |
| 0.0942    | 28.513            | 2.966             | 109.839                      | 0                            | 6.96      |
| 0.0946    | 28.403            | 2.966             | 109.839                      | 0                            | 6.79      |
| 0.0949    | 28.293            | 2.966             | 109.839                      | 0                            | 6.60      |
| 0.0952    | 28.184            | 2.966             | 109.839                      | 0                            | 6.81      |
| 0.0956    | 28.074            | 2.966             | 109.839                      | 0                            | 6.67      |
| 0.0959    | 27.964            | 2.966             | 109.839                      | 0                            | 6.64      |
| 0.0962    | 27.854            | 2.966             | 109.839                      | 0                            | 6.59      |
| 0.0966    | 27.744            | 2.966             | 109.839                      | 0                            | 6.60      |
| 0.0969    | 27.634            | 2.966             | 109.839                      | 0                            | 6.45      |
| 0.0973    | 27.525            | 2.966             | 109.839                      | 0                            | 6.43      |
| 0.0976    | 27.415            | 2.966             | 109.839                      | 0                            | 6.54      |
| 0.0980    | 27.305            | 2.966             | 109.839                      | 0                            | 6.81      |
| 0.0983    | 27.195            | 2.966             | 109.839                      | 0                            | 7.06      |
| 0.0987    | 27.085            | 2.966             | 109.839                      | 0                            | 6.90      |
| 0.0991    | 26.975            | 2.966             | 109.839                      | 0                            | 6.68      |
| 0.0994    | 26.866            | 2.966             | 109.839                      | 0                            | 6.47      |

Continued on next page



Table S10 – continued from previous page

| $x_{2,c}$ | $n_{1,c}$<br>mmol | $n_{2,c}$<br>mmol | $n_{1,s}$<br>$\mu\text{mol}$ | $n_{2,s}$<br>$\mu\text{mol}$ | $Q$<br>mJ |
|-----------|-------------------|-------------------|------------------------------|------------------------------|-----------|
| 0.0996    | 26.811            | 2.966             | 54.197                       | 0                            | 3.25      |
| 0.0972    | 98.452            | 10.603            | 275.372                      | 0                            | 17.19     |
| 0.0975    | 98.176            | 10.603            | 275.372                      | 0                            | 16.37     |
| 0.0977    | 97.901            | 10.603            | 275.372                      | 0                            | 16.97     |
| 0.0980    | 97.626            | 10.603            | 275.372                      | 0                            | 16.69     |
| 0.0982    | 97.350            | 10.603            | 275.372                      | 0                            | 16.45     |
| 0.0985    | 97.075            | 10.603            | 275.372                      | 0                            | 16.23     |
| 0.0987    | 96.799            | 10.603            | 275.372                      | 0                            | 15.42     |
| 0.0990    | 96.524            | 10.603            | 275.372                      | 0                            | 16.35     |
| 0.0992    | 96.249            | 10.603            | 275.372                      | 0                            | 16.62     |
| 0.0995    | 95.973            | 10.603            | 275.372                      | 0                            | 15.47     |
| 0.0997    | 95.698            | 10.603            | 275.372                      | 0                            | 15.58     |
| 0.0999    | 26.798            | 2.975             | 13.835                       | 5.920                        | -10.79    |
| 0.1001    | 26.812            | 2.981             | 13.835                       | 5.920                        | -10.99    |
| 0.1002    | 26.826            | 2.987             | 13.835                       | 5.920                        | -11.95    |
| 0.1003    | 26.839            | 2.993             | 13.835                       | 5.920                        | -11.85    |
| 0.1005    | 26.853            | 2.999             | 13.835                       | 5.920                        | -12.00    |
| 0.1006    | 26.867            | 3.005             | 13.835                       | 5.920                        | -12.00    |
| 0.1007    | 26.881            | 3.011             | 13.835                       | 5.920                        | -12.07    |
| 0.1009    | 26.895            | 3.017             | 13.835                       | 5.920                        | -11.95    |
| 0.1010    | 26.909            | 3.023             | 13.835                       | 5.920                        | -11.60    |
| 0.1011    | 26.922            | 3.029             | 13.835                       | 5.920                        | -12.10    |
| 0.1012    | 26.936            | 3.034             | 13.835                       | 5.920                        | -11.82    |
| 0.1014    | 26.950            | 3.040             | 13.835                       | 5.920                        | -11.79    |
| 0.1001    | 26.898            | 2.993             | 13.826                       | 5.927                        | -12.57    |
| 0.1003    | 26.912            | 2.999             | 13.826                       | 5.927                        | -12.79    |
| 0.1004    | 26.926            | 3.005             | 13.826                       | 5.927                        | -12.51    |
| 0.1005    | 26.940            | 3.011             | 13.826                       | 5.927                        | -12.68    |
| 0.1007    | 26.954            | 3.017             | 13.826                       | 5.927                        | -12.65    |
| 0.1008    | 26.967            | 3.023             | 13.826                       | 5.927                        | -12.56    |
| 0.1009    | 26.981            | 3.029             | 13.826                       | 5.927                        | -12.41    |
| 0.1011    | 26.995            | 3.035             | 13.826                       | 5.927                        | -12.32    |
| 0.1012    | 27.009            | 3.041             | 13.826                       | 5.927                        | -12.39    |
| 0.1013    | 27.023            | 3.046             | 13.826                       | 5.927                        | -12.39    |
| 0.1014    | 27.036            | 3.052             | 13.826                       | 5.927                        | -12.32    |
| 0.1016    | 27.050            | 3.058             | 13.826                       | 5.927                        | -13.16    |
| 0.1017    | 27.064            | 3.064             | 13.826                       | 5.927                        | -12.63    |
| 0.1018    | 27.078            | 3.070             | 13.826                       | 5.927                        | -12.86    |
| 0.1020    | 27.092            | 3.076             | 13.826                       | 5.927                        | -12.70    |
| 0.1021    | 27.106            | 3.082             | 13.826                       | 5.927                        | -12.18    |
| 0.1002    | 26.937            | 2.999             | 40.606                       | 10.154                       | -8.33     |
| 0.1003    | 26.978            | 3.009             | 40.606                       | 10.154                       | -8.16     |
| 0.1005    | 27.018            | 3.019             | 40.606                       | 10.154                       | -8.23     |
| 0.1007    | 27.059            | 3.029             | 40.606                       | 10.154                       | -8.31     |

Continued on next page

Table S10 – continued from previous page

| $x_{2,c}$ | $n_{1,c}$<br>mmol | $n_{2,c}$<br>mmol | $n_{1,s}$<br>$\mu\text{mol}$ | $n_{2,s}$<br>$\mu\text{mol}$ | $Q$<br>mJ |
|-----------|-------------------|-------------------|------------------------------|------------------------------|-----------|
| 0.1008    | 27.099            | 3.039             | 40.606                       | 10.154                       | -8.15     |
| 0.1010    | 27.140            | 3.049             | 40.606                       | 10.154                       | -8.42     |
| 0.1012    | 27.181            | 3.060             | 40.606                       | 10.154                       | -8.36     |
| 0.1013    | 27.221            | 3.070             | 40.606                       | 10.154                       | -8.25     |
| 0.1429    | 22.051            | 3.676             | 109.839                      | 0                            | -10.70    |
| 0.1435    | 21.941            | 3.676             | 109.839                      | 0                            | -11.28    |
| 0.1441    | 21.831            | 3.676             | 109.839                      | 0                            | -11.45    |
| 0.1448    | 21.721            | 3.676             | 109.839                      | 0                            | -11.75    |
| 0.1454    | 21.612            | 3.676             | 109.839                      | 0                            | -12.13    |
| 0.1460    | 21.502            | 3.676             | 109.839                      | 0                            | -12.35    |
| 0.1467    | 21.392            | 3.676             | 109.839                      | 0                            | -12.89    |
| 0.1473    | 21.282            | 3.676             | 109.839                      | 0                            | -13.17    |
| 0.1480    | 21.172            | 3.676             | 109.839                      | 0                            | -13.49    |
| 0.1486    | 21.062            | 3.676             | 109.839                      | 0                            | -13.85    |
| 0.1493    | 20.953            | 3.676             | 109.839                      | 0                            | -14.33    |
| 0.1944    | 17.563            | 4.239             | 54.197                       | 0                            | -20.94    |
| 0.1949    | 17.509            | 4.239             | 54.197                       | 0                            | -20.58    |
| 0.1954    | 17.454            | 4.239             | 54.197                       | 0                            | -20.68    |
| 0.1959    | 17.400            | 4.239             | 54.197                       | 0                            | -21.64    |
| 0.1964    | 17.346            | 4.239             | 54.197                       | 0                            | -21.11    |
| 0.1969    | 17.292            | 4.239             | 54.197                       | 0                            | -21.46    |
| 0.1974    | 17.238            | 4.239             | 54.197                       | 0                            | -21.96    |
| 0.1979    | 17.183            | 4.239             | 54.197                       | 0                            | -21.32    |
| 0.1984    | 17.129            | 4.239             | 54.197                       | 0                            | -21.56    |
| 0.1989    | 17.075            | 4.239             | 54.197                       | 0                            | -20.98    |
| 0.1994    | 17.021            | 4.239             | 54.197                       | 0                            | -21.20    |
| 0.1961    | 60.998            | 14.881            | 165.533                      | 0                            | -70.16    |
| 0.1965    | 60.833            | 14.881            | 165.533                      | 0                            | -74.22    |
| 0.1970    | 60.667            | 14.881            | 165.533                      | 0                            | -72.26    |
| 0.1974    | 60.502            | 14.881            | 165.533                      | 0                            | -74.87    |
| 0.1978    | 60.336            | 14.881            | 165.533                      | 0                            | -74.30    |
| 0.1983    | 60.171            | 14.881            | 165.533                      | 0                            | -73.10    |
| 0.1987    | 60.005            | 14.881            | 165.533                      | 0                            | -76.68    |
| 0.1992    | 59.840            | 14.881            | 165.533                      | 0                            | -73.61    |
| 0.1996    | 59.674            | 14.881            | 165.533                      | 0                            | -78.37    |
| 0.1953    | 62.278            | 15.118            | 165.533                      | 0                            | -55.79    |
| 0.1958    | 62.112            | 15.118            | 165.533                      | 0                            | -57.40    |
| 0.1962    | 61.947            | 15.118            | 165.533                      | 0                            | -59.23    |
| 0.1966    | 61.781            | 15.118            | 165.533                      | 0                            | -59.40    |
| 0.1970    | 61.616            | 15.118            | 165.533                      | 0                            | -62.47    |
| 0.1974    | 61.450            | 15.118            | 165.533                      | 0                            | -60.44    |
| 0.1979    | 61.285            | 15.118            | 165.533                      | 0                            | -62.79    |
| 0.1983    | 61.119            | 15.118            | 165.533                      | 0                            | -62.70    |
| 0.1987    | 60.954            | 15.118            | 165.533                      | 0                            | -65.10    |

Continued on next page

Table S10 – continued from previous page

| $x_{2,c}$ | $n_{1,c}$<br>mmol | $n_{2,c}$<br>mmol | $n_{1,s}$<br>$\mu\text{mol}$ | $n_{2,s}$<br>$\mu\text{mol}$ | $Q$<br>mJ |
|-----------|-------------------|-------------------|------------------------------|------------------------------|-----------|
| 0.1992    | 60.788            | 15.118            | 165.533                      | 0                            | -66.53    |
| 0.1996    | 60.622            | 15.118            | 165.533                      | 0                            | -67.15    |
| 0.1978    | 17.442            | 4.301             | 62.423                       | 6.936                        | -12.07    |
| 0.1981    | 17.380            | 4.294             | 62.423                       | 6.936                        | -11.27    |
| 0.1984    | 17.317            | 4.287             | 62.423                       | 6.936                        | -11.36    |
| 0.1988    | 17.255            | 4.280             | 62.423                       | 6.936                        | -11.94    |
| 0.1991    | 17.192            | 4.273             | 62.423                       | 6.936                        | -11.14    |
| 0.1994    | 17.130            | 4.266             | 62.423                       | 6.936                        | -11.78    |
| 0.1997    | 17.068            | 4.259             | 62.423                       | 6.936                        | -11.95    |
| 0.1972    | 17.572            | 4.316             | 62.423                       | 6.936                        | -11.01    |
| 0.1975    | 17.509            | 4.309             | 62.423                       | 6.936                        | -10.76    |
| 0.1978    | 17.447            | 4.302             | 62.423                       | 6.936                        | -10.26    |
| 0.1981    | 17.384            | 4.295             | 62.423                       | 6.936                        | -11.19    |
| 0.1984    | 17.322            | 4.288             | 62.423                       | 6.936                        | -11.09    |
| 0.1988    | 17.260            | 4.281             | 62.423                       | 6.936                        | -11.53    |
| 0.1991    | 17.197            | 4.274             | 62.423                       | 6.936                        | -11.41    |
| 0.1994    | 17.135            | 4.267             | 62.423                       | 6.936                        | -11.41    |
| 0.1997    | 17.072            | 4.260             | 62.423                       | 6.936                        | -11.35    |
| 0.2000    | 16.980            | 4.245             | 28.038                       | 11.999                       | -6.77     |
| 0.2003    | 17.047            | 4.269             | 35.125                       | 15.057                       | -8.53     |
| 0.2005    | 17.082            | 4.284             | 35.125                       | 15.057                       | -8.47     |
| 0.2007    | 17.117            | 4.299             | 35.125                       | 15.057                       | -8.47     |
| 0.2010    | 17.152            | 4.314             | 35.125                       | 15.057                       | -8.62     |
| 0.2014    | 17.222            | 4.344             | 35.125                       | 15.057                       | -8.60     |
| 0.2017    | 17.257            | 4.359             | 35.125                       | 15.057                       | -8.68     |
| 0.2019    | 17.292            | 4.374             | 35.125                       | 15.057                       | -8.52     |
| 0.1992    | 17.415            | 4.333             | 78.249                       | 8.694                        | -11.72    |
| 0.1996    | 17.337            | 4.325             | 78.249                       | 8.694                        | -11.82    |
| 0.2000    | 17.259            | 4.316             | 78.249                       | 8.694                        | -12.02    |
| 0.2005    | 17.180            | 4.307             | 78.249                       | 8.694                        | -11.80    |
| 0.2009    | 17.102            | 4.299             | 78.249                       | 8.694                        | -12.11    |
| 0.2013    | 17.024            | 4.290             | 78.249                       | 8.694                        | -11.87    |
| 0.2017    | 16.946            | 4.281             | 78.249                       | 8.694                        | -12.49    |
| 0.2449    | 14.156            | 4.591             | 54.197                       | 0                            | -34.62    |
| 0.2456    | 14.102            | 4.591             | 54.197                       | 0                            | -34.99    |
| 0.2463    | 14.048            | 4.591             | 54.197                       | 0                            | -36.27    |
| 0.2470    | 13.993            | 4.591             | 54.197                       | 0                            | -36.77    |
| 0.2478    | 13.939            | 4.591             | 54.197                       | 0                            | -37.48    |
| 0.2485    | 13.885            | 4.591             | 54.197                       | 0                            | -36.99    |
| 0.2492    | 13.831            | 4.591             | 54.197                       | 0                            | -33.95    |
| 0.2902    | 12.087            | 4.941             | 54.197                       | 0                            | -44.56    |
| 0.2911    | 12.033            | 4.941             | 54.197                       | 0                            | -44.47    |
| 0.2920    | 11.979            | 4.941             | 54.197                       | 0                            | -44.01    |
| 0.2929    | 11.924            | 4.941             | 54.197                       | 0                            | -47.62    |

Continued on next page

Table S10 – continued from previous page

| $x_{2,c}$ | $n_{1,c}$<br>mmol | $n_{2,c}$<br>mmol | $n_{1,s}$<br>$\mu\text{mol}$ | $n_{2,s}$<br>$\mu\text{mol}$ | $Q$<br>mJ |
|-----------|-------------------|-------------------|------------------------------|------------------------------|-----------|
| 0.2939    | 11.870            | 4.941             | 54.197                       | 0                            | -48.02    |
| 0.2948    | 11.816            | 4.941             | 54.197                       | 0                            | -56.16    |
| 0.2958    | 11.762            | 4.941             | 54.197                       | 0                            | -59.34    |
| 0.2968    | 11.708            | 4.941             | 54.197                       | 0                            | -59.44    |
| 0.2977    | 11.653            | 4.941             | 54.197                       | 0                            | -61.96    |
| 0.2987    | 11.599            | 4.941             | 54.197                       | 0                            | -63.96    |
| 0.2922    | 44.599            | 18.413            | 156.498                      | 17.389                       | -97.07    |
| 0.2927    | 44.442            | 18.396            | 156.498                      | 17.389                       | -98.92    |
| 0.2933    | 44.286            | 18.378            | 156.498                      | 17.389                       | -100.97   |
| 0.2938    | 44.129            | 18.361            | 156.498                      | 17.389                       | -101.14   |
| 0.2939    | 44.099            | 18.358            | 30.801                       | 3.422                        | -18.45    |
| 0.2945    | 43.942            | 18.340            | 156.498                      | 17.389                       | -102.49   |
| 0.2950    | 43.786            | 18.323            | 156.498                      | 17.389                       | -102.84   |
| 0.2956    | 43.629            | 18.305            | 156.498                      | 17.389                       | -102.19   |
| 0.2961    | 43.473            | 18.288            | 156.498                      | 17.389                       | -103.28   |
| 0.2967    | 43.316            | 18.271            | 156.498                      | 17.389                       | -104.14   |
| 0.2972    | 43.160            | 18.253            | 156.498                      | 17.389                       | -103.78   |
| 0.2978    | 43.003            | 18.236            | 156.498                      | 17.389                       | -103.48   |
| 0.2983    | 42.847            | 18.219            | 156.498                      | 17.389                       | -103.56   |
| 0.2989    | 42.690            | 18.201            | 156.498                      | 17.389                       | -104.99   |
| 0.2995    | 42.534            | 18.184            | 156.498                      | 17.389                       | -106.09   |
| 0.2951    | 42.080            | 17.615            | 109.839                      | 0                            | -119.93   |
| 0.2956    | 41.970            | 17.615            | 109.839                      | 0                            | -121.34   |
| 0.2962    | 41.860            | 17.615            | 109.839                      | 0                            | -120.17   |
| 0.2967    | 41.750            | 17.615            | 109.839                      | 0                            | -121.48   |
| 0.2973    | 41.640            | 17.615            | 109.839                      | 0                            | -122.02   |
| 0.2978    | 41.531            | 17.615            | 109.839                      | 0                            | -121.33   |
| 0.2984    | 41.421            | 17.615            | 109.839                      | 0                            | -124.14   |
| 0.2989    | 41.311            | 17.615            | 109.839                      | 0                            | -122.23   |
| 0.2995    | 41.201            | 17.615            | 109.839                      | 0                            | -121.68   |
| 0.2968    | 11.773            | 4.969             | 30.801                       | 3.422                        | -17.78    |
| 0.2972    | 11.743            | 4.965             | 30.801                       | 3.422                        | -15.95    |
| 0.2976    | 11.712            | 4.962             | 30.801                       | 3.422                        | -16.25    |
| 0.2980    | 11.681            | 4.959             | 30.801                       | 3.422                        | -16.30    |
| 0.2984    | 11.650            | 4.955             | 30.801                       | 3.422                        | -16.63    |
| 0.2988    | 11.619            | 4.952             | 30.801                       | 3.422                        | -17.82    |
| 0.2992    | 11.589            | 4.948             | 30.801                       | 3.422                        | -17.56    |
| 0.2996    | 11.558            | 4.945             | 30.801                       | 3.422                        | -15.65    |
| 0.2944    | 11.986            | 5.001             | 30.801                       | 3.422                        | -18.76    |
| 0.2948    | 11.955            | 4.998             | 30.801                       | 3.422                        | -18.70    |
| 0.2952    | 11.924            | 4.994             | 30.801                       | 3.422                        | -19.01    |
| 0.2960    | 11.863            | 4.987             | 30.801                       | 3.422                        | -19.63    |
| 0.2964    | 11.832            | 4.984             | 30.801                       | 3.422                        | -21.90    |
| 0.2968    | 11.801            | 4.981             | 30.801                       | 3.422                        | -19.98    |

Continued on next page

**Table S10** – continued from previous page

| $x_{2,c}$ | $n_{1,c}$<br>mmol | $n_{2,c}$<br>mmol | $n_{1,s}$<br>$\mu\text{mol}$ | $n_{2,s}$<br>$\mu\text{mol}$ | $Q$<br>mJ |
|-----------|-------------------|-------------------|------------------------------|------------------------------|-----------|
| 0.2972    | 11.770            | 4.977             | 30.801                       | 3.422                        | -19.54    |
| 0.2976    | 11.739            | 4.974             | 30.801                       | 3.422                        | -15.24    |
| 0.2984    | 11.678            | 4.967             | 30.801                       | 3.422                        | -23.12    |
| 0.2988    | 11.647            | 4.963             | 30.801                       | 3.422                        | -19.31    |
| 0.2992    | 11.616            | 4.960             | 30.801                       | 3.422                        | -21.94    |
| 0.2996    | 11.585            | 4.957             | 30.801                       | 3.422                        | -22.06    |
| 0.2983    | 43.250            | 18.384            | 142.962                      | 35.749                       | -23.69    |
| 0.2986    | 43.107            | 18.348            | 142.962                      | 35.749                       | -24.00    |
| 0.2988    | 42.985            | 18.317            | 122.392                      | 30.606                       | -20.64    |
| 0.2991    | 42.862            | 18.287            | 122.392                      | 30.606                       | -20.49    |
| 0.2993    | 42.760            | 18.261            | 101.803                      | 25.457                       | -17.23    |
| 0.2995    | 42.659            | 18.236            | 101.803                      | 25.457                       | -17.28    |
| 0.2996    | 42.577            | 18.216            | 81.766                       | 20.446                       | -13.73    |
| 0.2998    | 42.495            | 18.195            | 81.766                       | 20.446                       | -14.01    |
| 0.2999    | 42.434            | 18.180            | 61.196                       | 15.303                       | -10.44    |
| 0.2983    | 43.253            | 18.385            | 142.962                      | 35.749                       | -23.23    |
| 0.2986    | 43.110            | 18.350            | 142.962                      | 35.749                       | -23.72    |
| 0.2988    | 42.988            | 18.319            | 122.392                      | 30.606                       | -20.05    |
| 0.2991    | 42.866            | 18.288            | 122.392                      | 30.606                       | -19.99    |
| 0.2993    | 42.764            | 18.263            | 101.803                      | 25.457                       | -16.71    |
| 0.2995    | 42.662            | 18.237            | 101.803                      | 25.457                       | -17.24    |
| 0.2996    | 42.580            | 18.217            | 81.766                       | 20.446                       | -13.57    |
| 0.2998    | 42.498            | 18.196            | 81.766                       | 20.446                       | -12.82    |
| 0.2999    | 42.437            | 18.181            | 61.196                       | 15.303                       | -11.19    |

**Table S11** Isothermal titration calorimetry data for ethylene glycol (1) + choline chloride (2) at 298.15 K. Where  $n_i$  are the number of moles of  $i$  in the cell (subscript c) or syringe (subscript s), and  $Q$  is the heat flow integral for each injection.

| $x_{2,c}$ | $n_{1,c}$<br>mmol | $n_{2,c}$<br>mmol | $n_{1,s}$<br>$\mu\text{mol}$ | $n_{2,s}$<br>$\mu\text{mol}$ | $Q$<br>mJ |
|-----------|-------------------|-------------------|------------------------------|------------------------------|-----------|
| 0.0034    | 12.605            | 0.043             | 57.205                       | 14.309                       | 14.91     |
| 0.0045    | 12.662            | 0.057             | 57.205                       | 14.309                       | 17.51     |
| 0.0056    | 12.719            | 0.072             | 57.205                       | 14.309                       | 17.42     |
| 0.0383    | 11.474            | 0.457             | 57.205                       | 14.309                       | 17.07     |
| 0.0392    | 11.532            | 0.471             | 57.205                       | 14.309                       | 17.01     |
| 0.0402    | 11.589            | 0.485             | 57.205                       | 14.309                       | 16.86     |
| 0.0411    | 11.646            | 0.500             | 57.205                       | 14.309                       | 16.87     |
| 0.0421    | 11.703            | 0.514             | 57.205                       | 14.309                       | 16.45     |
| 0.0430    | 11.760            | 0.528             | 57.205                       | 14.309                       | 16.54     |
| 0.0439    | 11.818            | 0.542             | 57.205                       | 14.309                       | 16.24     |
| 0.0383    | 11.423            | 0.455             | 57.205                       | 14.309                       | 17.19     |
| 0.0392    | 11.480            | 0.469             | 57.205                       | 14.309                       | 17.04     |
| 0.0402    | 11.537            | 0.483             | 57.205                       | 14.309                       | 17.03     |
| 0.0411    | 11.594            | 0.498             | 57.205                       | 14.309                       | 16.90     |
| 0.0421    | 11.651            | 0.512             | 57.205                       | 14.309                       | 16.59     |
| 0.0430    | 11.709            | 0.526             | 57.205                       | 14.309                       | 16.20     |
| 0.0439    | 11.766            | 0.540             | 57.205                       | 14.309                       | 16.32     |
| 0.0959    | 10.360            | 1.099             | 88.972                       | 0                            | 16.83     |
| 0.0967    | 10.271            | 1.099             | 88.972                       | 0                            | 16.21     |
| 0.0974    | 10.182            | 1.099             | 88.972                       | 0                            | 14.91     |
| 0.0982    | 10.093            | 1.099             | 88.972                       | 0                            | 15.38     |
| 0.0984    | 41.900            | 4.573             | 71.460                       | 0                            | 5.39      |
| 0.0986    | 41.828            | 4.573             | 71.460                       | 0                            | 5.42      |
| 0.0987    | 41.757            | 4.573             | 71.460                       | 0                            | 5.47      |
| 0.0989    | 41.686            | 4.573             | 71.460                       | 0                            | 5.55      |
| 0.0990    | 41.614            | 4.573             | 71.460                       | 0                            | 5.42      |
| 0.0992    | 41.543            | 4.573             | 71.460                       | 0                            | 5.48      |
| 0.0993    | 41.471            | 4.573             | 71.460                       | 0                            | 5.54      |
| 0.0995    | 41.400            | 4.573             | 71.460                       | 0                            | 5.65      |
| 0.0996    | 41.328            | 4.573             | 71.460                       | 0                            | 5.61      |
| 0.1375    | 9.297             | 1.482             | 71.460                       | 0                            | 6.93      |
| 0.1384    | 9.226             | 1.482             | 71.460                       | 0                            | 6.65      |
| 0.1393    | 9.154             | 1.482             | 71.460                       | 0                            | 7.45      |
| 0.1402    | 9.507             | 1.550             | 178.427                      | 0                            | 23.10     |
| 0.1425    | 9.329             | 1.550             | 178.427                      | 0                            | 26.14     |
| 0.1449    | 9.150             | 1.550             | 178.427                      | 0                            | 26.75     |
| 0.1403    | 9.605             | 1.567             | 178.427                      | 0                            | 22.86     |
| 0.1449    | 9.248             | 1.567             | 356.854                      | 0                            | 51.81     |
| 0.1882    | 8.494             | 1.969             | 88.972                       | 0                            | 29.46     |
| 0.1898    | 8.405             | 1.969             | 88.972                       | 0                            | 30.53     |
| 0.1914    | 8.316             | 1.969             | 88.972                       | 0                            | 30.98     |
| 0.1931    | 8.227             | 1.969             | 88.972                       | 0                            | 31.30     |

Continued on next page

**Table S11** – continued from previous page

| $x_{2,c}$ | $n_{1,c}$<br>mmol | $n_{2,c}$<br>mmol | $n_{1,s}$<br>$\mu\text{mol}$ | $n_{2,s}$<br>$\mu\text{mol}$ | $Q$<br>mJ |
|-----------|-------------------|-------------------|------------------------------|------------------------------|-----------|
| 0.1948    | 8.138             | 1.969             | 88.972                       | 0                            | 32.13     |
| 0.1965    | 8.049             | 1.969             | 88.972                       | 0                            | 32.61     |
| 0.1983    | 7.960             | 1.969             | 88.972                       | 0                            | 33.00     |
| 0.1970    | 33.709            | 8.269             | 71.460                       | 0                            | 26.77     |
| 0.1973    | 33.637            | 8.269             | 71.460                       | 0                            | 26.64     |
| 0.1976    | 33.566            | 8.269             | 71.460                       | 0                            | 27.12     |
| 0.1980    | 33.494            | 8.269             | 71.460                       | 0                            | 27.74     |
| 0.1983    | 33.423            | 8.269             | 71.460                       | 0                            | 27.58     |
| 0.1987    | 33.352            | 8.269             | 71.460                       | 0                            | 27.05     |
| 0.1990    | 33.280            | 8.269             | 71.460                       | 0                            | 27.47     |
| 0.1994    | 33.209            | 8.269             | 71.460                       | 0                            | 27.75     |
| 0.1997    | 33.137            | 8.269             | 71.460                       | 0                            | 27.50     |
| 0.2449    | 30.254            | 9.813             | 71.460                       | 0                            | 41.30     |
| 0.2454    | 30.183            | 9.813             | 71.460                       | 0                            | 41.31     |
| 0.2458    | 30.111            | 9.813             | 71.460                       | 0                            | 41.56     |
| 0.2462    | 30.040            | 9.813             | 71.460                       | 0                            | 41.99     |
| 0.2467    | 29.968            | 9.813             | 71.460                       | 0                            | 41.96     |
| 0.2471    | 29.897            | 9.813             | 71.460                       | 0                            | 42.10     |
| 0.2476    | 29.825            | 9.813             | 71.460                       | 0                            | 42.02     |
| 0.2480    | 29.754            | 9.813             | 71.460                       | 0                            | 42.35     |
| 0.2485    | 29.682            | 9.813             | 71.460                       | 0                            | 42.46     |
| 0.2489    | 29.611            | 9.813             | 71.460                       | 0                            | 42.17     |
| 0.2494    | 29.540            | 9.813             | 71.460                       | 0                            | 42.55     |

**Table S12** Isothermal titration calorimetry data for 1,3-propanediol (1) + choline chloride (2) at 298.15 K. Where  $n_i$  are the number of moles of  $i$  in the cell (subscript c) or syringe (subscript s), and  $Q$  is the heat flow integral for each injection.

| $x_{2,c}$ | $n_{1,c}$<br>mmol | $n_{2,c}$<br>mmol | $n_{1,s}$<br>$\mu\text{mol}$ | $n_{2,s}$<br>$\mu\text{mol}$ | $Q$<br>mJ |
|-----------|-------------------|-------------------|------------------------------|------------------------------|-----------|
| 0.0005    | 10.111            | 0.005             | 19.270                       | 4.763                        | 13.27     |
| 0.0009    | 10.130            | 0.010             | 19.270                       | 4.763                        | 13.76     |
| 0.0014    | 10.149            | 0.014             | 19.270                       | 4.763                        | 13.76     |
| 0.0019    | 10.168            | 0.019             | 19.270                       | 4.763                        | 14.47     |
| 0.0023    | 10.188            | 0.024             | 19.270                       | 4.763                        | 13.95     |
| 0.0028    | 10.207            | 0.029             | 19.270                       | 4.763                        | 14.42     |
| 0.0032    | 10.226            | 0.033             | 19.270                       | 4.763                        | 14.73     |
| 0.0037    | 10.245            | 0.038             | 19.270                       | 4.763                        | 14.44     |
| 0.0042    | 10.265            | 0.043             | 19.270                       | 4.763                        | 14.69     |
| 0.0046    | 10.284            | 0.048             | 19.270                       | 4.763                        | 14.30     |
| 0.0051    | 10.303            | 0.052             | 19.270                       | 4.763                        | 14.47     |
| 0.0055    | 10.323            | 0.057             | 19.270                       | 4.763                        | 14.60     |
| 0.0060    | 10.342            | 0.062             | 19.270                       | 4.763                        | 14.68     |
| 0.0064    | 10.361            | 0.067             | 19.270                       | 4.763                        | 14.61     |
| 0.0068    | 10.380            | 0.071             | 19.270                       | 4.763                        | 14.60     |
| 0.0981    | 8.608             | 0.937             | 27.384                       | 0                            | 4.45      |
| 0.0984    | 8.581             | 0.937             | 27.384                       | 0                            | 4.33      |
| 0.0987    | 8.553             | 0.937             | 27.384                       | 0                            | 4.37      |
| 0.0990    | 8.526             | 0.937             | 27.384                       | 0                            | 4.47      |
| 0.0993    | 8.498             | 0.937             | 27.384                       | 0                            | 4.46      |
| 0.0996    | 8.471             | 0.937             | 27.384                       | 0                            | 4.52      |
| 0.0998    | 8.444             | 0.937             | 27.384                       | 0                            | 4.49      |
| 0.1478    | 32.351            | 5.610             | 55.141                       | 0                            | 19.42     |
| 0.1480    | 32.295            | 5.610             | 55.141                       | 0                            | 19.31     |
| 0.1482    | 32.240            | 5.610             | 55.141                       | 0                            | 19.26     |
| 0.1484    | 32.185            | 5.610             | 55.141                       | 0                            | 19.35     |
| 0.1487    | 32.130            | 5.610             | 55.141                       | 0                            | 19.66     |
| 0.1489    | 32.075            | 5.610             | 55.141                       | 0                            | 19.58     |
| 0.1491    | 32.020            | 5.610             | 55.141                       | 0                            | 20.03     |
| 0.1493    | 31.965            | 5.610             | 55.141                       | 0                            | 19.68     |
| 0.1495    | 31.909            | 5.610             | 55.141                       | 0                            | 19.92     |
| 0.1878    | 7.445             | 1.721             | 68.653                       | 0                            | 36.91     |
| 0.1892    | 7.376             | 1.721             | 68.653                       | 0                            | 37.40     |
| 0.1906    | 7.308             | 1.721             | 68.653                       | 0                            | 37.95     |
| 0.1921    | 7.239             | 1.721             | 68.653                       | 0                            | 38.46     |
| 0.1936    | 7.170             | 1.721             | 68.653                       | 0                            | 38.91     |
| 0.1951    | 7.102             | 1.721             | 68.653                       | 0                            | 39.60     |
| 0.1966    | 7.033             | 1.721             | 68.653                       | 0                            | 39.94     |



**Table S13** Dissolution calorimetry data for choline chloride (ChCl) dissolved in water (H<sub>2</sub>O) + ChCl, ethylene glycol (EG) + ChCl, and 1,3-propanediol (13PD) + ChCl mixtures at 298.15 K. Where  $n_i$  are the number of moles of  $i$  in the cell (subscript c), or cartridge (subscript cart), and  $Q_{\text{sol}}$  is the heat of dissolution. We also list the heat of mixing ( $Q$ ) calculated from  $Q_{\text{sol}}$  and ChCl fusion properties using the four discussed values for  $\Delta_{\text{fus}}C_{p,\text{ChCl}}$  ( $\Delta C_p$ ).

| component        |      | $x_2$   | $n_{1,c}$ | $n_{2,c}$ | $n_{2,\text{cart}}$ | $\Delta C_p \rightarrow$ | 0         | 9.7      | 20.3     | 30.9     |
|------------------|------|---------|-----------|-----------|---------------------|--------------------------|-----------|----------|----------|----------|
| 1                | 2    |         | mmol      | mmol      | $\mu\text{mol}$     | $Q_{\text{sol}}$         | $Q$       | $Q$      | $Q$      | $Q$      |
|                  |      |         |           |           |                     | mJ                       | mJ        | mJ       | mJ       | mJ       |
| H <sub>2</sub> O | ChCl | 0.00000 | 1387.887  | 0.000     | 724.201             | 9299.17                  | -12499.28 | -8984.85 | -5999.83 | -3014.81 |
|                  |      | 0.29963 | 353.786   | 151.355   | 725.677             | 10869.65                 | -10973.23 | -7451.63 | -4460.53 | -1469.43 |
| EG               | ChCl | 0.00000 | 266.269   | 0.000     | 76.207              | 1518.14                  | -775.69   | -405.87  | -91.76   | 222.35   |
|                  |      | 0.00000 | 265.994   | 0.000     | 65.965              | 1333.99                  | -651.55   | -331.43  | -59.54   | 212.36   |
|                  |      | 0.00000 | 266.025   | 0.000     | 65.678              | 1356.93                  | -619.99   | -301.26  | -30.55   | 240.17   |
|                  |      | 0.00022 | 266.133   | 0.060     | 122.475             | 2542.80                  | -1143.71  | -549.35  | -44.53   | 460.29   |
|                  |      | 0.00025 | 266.025   | 0.066     | 69.546              | 1410.53                  | -682.80   | -345.31  | -58.65   | 228.00   |
|                  |      | 0.00025 | 265.994   | 0.066     | 62.169              | 1276.00                  | -595.28   | -293.58  | -37.34   | 218.91   |
|                  |      | 0.00029 | 266.269   | 0.076     | 70.405              | 1380.59                  | -738.61   | -396.95  | -106.75  | 183.45   |
|                  |      | 0.00055 | 266.269   | 0.147     | 69.474              | 1414.82                  | -676.36   | -339.21  | -52.85   | 233.51   |
|                  |      | 0.10000 | 212.627   | 23.626    | 158.287             | 3214.40                  | -1550.03  | -781.89  | -129.46  | 522.97   |
|                  |      | 0.19977 | 170.398   | 42.537    | 66.609              | 1320.09                  | -684.85   | -361.61  | -87.06   | 187.50   |
|                  |      | 0.20000 | 169.816   | 42.455    | 104.283             | 2063.00                  | -1075.92  | -569.85  | -140.02  | 289.82   |
| 13PD             | ChCl | 0.20002 | 170.398   | 42.604    | 68.042              | 1373.84                  | -674.22   | -344.02  | -63.57   | 216.89   |
|                  |      | 0.00000 | 216.777   | 0.000     | 110.586             | 2853.30                  | -475.33   | 61.32    | 517.14   | 972.95   |
|                  |      | 0.00051 | 216.777   | 0.111     | 53.717              | 1226.90                  | -389.99   | -129.31  | 92.10    | 313.52   |

**Table S14** Redlich–Kister polynomial fitting parameters for the normalised molar excess Gibbs energy ( $G^E/RT$ ) of H<sub>2</sub>O + choline chloride (ChCl), ethylene glycol (EG) + ChCl, and 1,3-propanediol (13PD) + ChCl mixtures at 298.15 K. The parameters were obtained by fitting the normalised partial molar excess Gibbs energies ( $G_i^E/RT$ ) listed in Table S5–S9.

| component        |      | $\Delta_{\text{fus}}C_{p,\text{ChCl}}$           | $p_0$  | $p_1$  |
|------------------|------|--------------------------------------------------|--------|--------|
| 1                | 2    | $\text{J}\cdot\text{mol}^{-1}\cdot\text{K}^{-1}$ |        |        |
| 13PD             | ChCl | 0.0                                              | -5.514 | 0.884  |
|                  |      | 9.7                                              | -4.379 | 0.996  |
|                  |      | 20.3                                             | -3.231 | 0.947  |
|                  |      | 30.9                                             | -2.083 | 0.898  |
| EG               | ChCl | 0.0                                              | -6.609 | -0.597 |
|                  |      | 9.7                                              | -5.264 | -0.336 |
|                  |      | 20.3                                             | -3.951 | -0.278 |
|                  |      | 30.9                                             | -2.638 | -0.227 |
| H <sub>2</sub> O | ChCl | 0.0                                              | -9.275 | -3.251 |
|                  |      | 9.7                                              | -7.548 | -2.806 |
|                  |      | 20.3                                             | -5.897 | -2.606 |
|                  |      | 30.9                                             | -4.246 | -2.407 |

**Table S15** Redlich–Kister polynomial fitting parameters for the normalised molar excess enthalpy ( $H^E/RT$ ) of H<sub>2</sub>O + choline chloride (ChCl), ethylene glycol (EG) + ChCl, and 1,3-propanediol (13PD) + ChCl mixtures at 298.15 K. The parameters were obtained by fitting  $Q/RT \sum \Delta n_i$ , as described in section SI–1.3. Values of  $Q$  are listed in Table S10–S13.

| component |      | $\Delta_{\text{fus}}C_{p,\text{ChCl}}$<br>J·mol <sup>-1</sup> ·K <sup>-1</sup> | $p_0$   | $p_1$   | $p_2$               |
|-----------|------|--------------------------------------------------------------------------------|---------|---------|---------------------|
| 1         | 2    |                                                                                |         |         |                     |
| 13PD      | ChCl | 20.3                                                                           | -15.932 | 14.187  | -4.057 <sup>a</sup> |
|           |      | 0.0                                                                            | -7.161  | 5.427   |                     |
|           |      | 9.7                                                                            | -3.891  | 4.113   |                     |
|           |      | 20.3                                                                           | -1.114  | 2.998   |                     |
|           |      | 30.9                                                                           | 1.664   | 1.882   |                     |
| EG        | ChCl | 20.3                                                                           | -24.059 | 20.981  | -8.013 <sup>a</sup> |
|           |      | 0.0                                                                            | -7.669  | 4.237   |                     |
|           |      | 9.7                                                                            | -4.321  | 2.788   |                     |
|           |      | 20.3                                                                           | -1.477  | 1.557   |                     |
|           |      | 30.9                                                                           | 1.367   | 0.326   |                     |
| H2O       | ChCl | 20.3                                                                           | 56.775  | -48.442 | 20.088 <sup>a</sup> |
|           |      | 0.0                                                                            | -11.925 | 4.913   |                     |
|           |      | 9.7                                                                            | -8.361  | 3.281   |                     |
|           |      | 20.3                                                                           | -5.333  | 1.895   |                     |
|           |      | 30.9                                                                           | -2.305  | 0.509   |                     |

<sup>a</sup> Fit only to  $H_1^E/RT$

**Table S16** Positions of first maximum and minimum of radial distribution functions between the H atom of the HBD.

| $x_{\text{ChCl}}$                                          | $r_{\text{max}}/\text{Å}$ | $r_{\text{min}}/\text{Å}$ |
|------------------------------------------------------------|---------------------------|---------------------------|
| Ethylene glycol                                            |                           |                           |
| H <sub>EG</sub> ···O <sub>EG</sub>                         |                           |                           |
| 0.0                                                        | 1.983                     | 2.583                     |
| 0.1                                                        | 1.983                     | 2.550                     |
| 0.3                                                        | 1.983                     | 2.417                     |
| H <sub>EG</sub> ···Cl                                      |                           |                           |
| 0.1                                                        | 2.150                     | 3.183                     |
| 0.3                                                        | 2.116                     | 2.917                     |
| Water                                                      |                           |                           |
| H <sub>H<sub>2</sub>O</sub> ···O <sub>H<sub>2</sub>O</sub> |                           |                           |
| 0.0                                                        | 1.850                     | 2.450                     |
| 0.1                                                        | 1.817                     | 2.317                     |
| 0.3                                                        | 1.783                     | 2.250                     |
| H <sub>H<sub>2</sub>O</sub> ···O <sub>Ch</sub>             |                           |                           |
| 0.1                                                        | 1.450                     | 2.283                     |
| 0.3                                                        | 1.450                     | 2.283                     |
| H <sub>H<sub>2</sub>O</sub> ···Cl                          |                           |                           |
| 0.1                                                        | 2.017                     | 2.850                     |
| 0.3                                                        | 2.050                     | 2.910                     |

**Table S17** Positions of first maximum and minimum of radial distribution functions between the center of mass of Ch and Cl and corresponding coordination number. In the right-most column the percentage deviation from the expected value considering the change in salt concentration.

| $x_{\text{ChCl}}$                                      | $r_{\text{max}} / \text{\AA}$ | $r_{\text{min}} / \text{\AA}$ | $n_{\text{coord}}$ | $\delta / \%$ |
|--------------------------------------------------------|-------------------------------|-------------------------------|--------------------|---------------|
| Ethylene glycol                                        |                               |                               |                    |               |
| $\text{Ch}_{\text{COM}} \cdots \text{Cl}_{\text{COM}}$ |                               |                               |                    |               |
| 0.1                                                    | 5.054                         | 7.296                         | 1.36               |               |
| 0.3                                                    | 5.054                         | 6.613                         | 3.26               | -3            |
| Water                                                  |                               |                               |                    |               |
| $\text{Ch}_{\text{COM}} \cdots \text{Cl}_{\text{COM}}$ |                               |                               |                    |               |
| 0.1                                                    | 4.891                         | 6.874                         | 3.44               |               |
| 0.3                                                    | 4.859                         | 6.453                         | 5.11               | -12           |

## References

- [1] D. Bohne, S. Fischer, E. Obermeier, *Berichte der Bunsengesellschaft für Phys. Chemie* **1984**, *88*, 739–742.
- [2] J. Dean, *Mater. Manuf. Process.* **1990**, *5*, 687–688.
- [3] S. M. Vilas-Boas, D. O. Abranches, E. A. Crespo, O. Ferreira, J. A. P. Coutinho, S. P. Pinho, *J. Mol. Liq.* **2020**, *300*, 112281.
- [4] R. B. Leron, A. N. Soriano, M.-H. Li, *J. Taiwan Inst. Chem. Eng.* **2012**, *43*, 551–557.
- [5] K. Shahbaz, F. S. Mjalli, M. Hashim, I. AlNashef, *Thermochim. Acta* **2011**, *515*, 67–72.
- [6] K. Shahbaz, S. Baroutian, F. Mjalli, M. Hashim, I. AlNashef, *Thermochim. Acta* **2012**, *527*, 59–66.
- [7] A. Yadav, J. R. Kar, M. Verma, S. Naqvi, S. Pandey, *Thermochim. Acta* **2015**, *600*, 95–101.
- [8] Y. Zhang, D. Poe, L. Heroux, H. Squire, B. W. Doherty, Z. Long, M. Dadmun, B. Gurkan, M. E. Tuckerman, E. J. Maginn, *J. Phys. Chem. B* **2020**, *124*, 5251–5264.
- [9] Y. Zhang, H. Squire, B. Gurkan, E. J. Maginn, *J. Chem. Eng. Data* **2022**, *67*, 1864–1871.
- [10] A. van den Bruinhorst, J. Avila, M. Rosenthal, A. Pellegrino, M. Burghammer, M. Costa Gomes, *Nat. Commun.* **2023**, *14*, 6684.
- [11] A. I. M. C. Lobo Ferreira, S. M. Vilas-Boas, R. M. A. Silva, M. A. R. Martins, D. O. Abranches, P. C. R. Soares-Santos, F. A. Almeida Paz, O. Ferreira, S. P. Pinho, L. M. N. B. F. Santos, J. A. P. Coutinho, *Phys. Chem. Chem. Phys.* **2022**, *24*, 14886–14897.
- [12] I. C. M. Vaz, A. I. M. C. Lobo Ferreira, G. M. C. Silva, P. Morgado, D. O. Abranches, M. Bastos, L. M. N. B. F. Santos, E. J. M. Filipe, J. A. P. Coutinho, *Phys. Chem. Chem. Phys.* **2023**, *25*, 11227–11236.
- [13] R. Feistel, D. G. Wright, K. Miyagawa, A. H. Harvey, J. Hruby, D. R. Jackett, T. J. McDougall, W. Wagner, *Ocean Sci.* **2008**, *4*, 275–291.
- [14] E. S. Domalski, E. D. Hearing, *J. Phys. Chem. Ref. Data* **1996**, *25*, 1–525.
- [15] G. S. Parks, K. K. Kelley, *J. Am. Chem. Soc.* **1925**, *47*, 2089–2097.
- [16] Z. Nan, B. Liu, Z. Tan, *J. Chem. Thermodyn.* **2002**, *34*, 915–926.
- [17] J. B. Macaskill, M. S. Mohan, R. G. Bates, *Anal. Chem.* **1977**, *49*, 209–212.
- [18] I. Khan, K. A. Kurnia, T. E. Sintra, J. A. Saraiva, S. P. Pinho, J. A. P. Coutinho, *Fluid Phase Equilib.* **2014**, *361*, 16–22.
- [19] H. Zhang, M. L. Ferrer, M. J. Roldán-Ruiz, R. J. Jiménez-Riobóo, M. C. Gutiérrez, F. del Monte, *J. Phys. Chem. B* **2020**, *124*, 4002–4009.
- [20] E. Mangiacapre, F. Castiglione, M. D’Aristotile, V. Di Lisio, A. Triolo, O. Russina, *J. Mol. Liq.* **2023**, *383*, 122120.
- [21] V. Agieienko, R. Buchner, *Phys. Chem. Chem. Phys.* **2022**, *24*, 5265–5268.
